# Supplementary material for: Exploring ethnic differences in the distribution of blood test results in healthy adult populations to inform earlier cancer detection: a systematic review
Source: PubMed Central journal article supplement (PMC11461158; doi:10.1093/fampra/cmae021), 2024-05-06
Supplement: cmae021_suppl_supplementary_appendix.pdf [file cmae021_suppl_supplementary_appendix.pdf]

## Supplementary materials

|                                                                                                        |    |
|--------------------------------------------------------------------------------------------------------|----|
| Appendix 1 Preferred Reporting Items for Systematic reviews and Meta-Analyses (PRISMA) checklist ..... | 4  |
| Appendix 2 Search criteria - Ethnicity and blood test result distribution .....                        | 7  |
| Appendix 3 Data extraction form.....                                                                   | 11 |
| Appendix 4 Adapted Newcastle- Ottawa scale.....                                                        | 14 |
| Appendix 5 Study characteristics and summary of results by blood tests .....                           | 16 |
| Appendix 6 Meta-analyses result and forest plots .....                                                 | 37 |
| Haemoglobin Black vs White female (subgroup-country) .....                                             | 37 |
| Haemoglobin Black vs White female (subgroup-study quality).....                                        | 38 |
| Haemoglobin Black vs White female (Fixed-effects model and random-effects model).....                  | 39 |
| Haemoglobin Black vs White male (subgroup-country) .....                                               | 40 |
| Haemoglobin Black vs White male (subgroup-study quality).....                                          | 41 |
| Haemoglobin Black vs White male (Fixed-effects model and random-effects model).....                    | 42 |
| Haemoglobin Asian vs White male (Fixed-effects model and random-effects model).....                    | 43 |

|                                                                                          |    |
|------------------------------------------------------------------------------------------|----|
| Haemoglobin Black vs Asian female (Fixed-effects model and random-effects model) .....   | 44 |
| Haemoglobin Black vs Asian male (Fixed-effects model and random-effects model) .....     | 45 |
| MCV Black vs White female (subgroup by country of study) .....                           | 46 |
| MCV Black vs White female (subgroup by study quality).....                               | 47 |
| MCV Black vs White female (Fixed-effects model and random-effects model) .....           | 48 |
| MCV Black vs White male (subgroup by country of study) .....                             | 49 |
| MCV Black vs White male (subgroup by study quality).....                                 | 50 |
| MCV Black vs White male (Fixed-effects model and random-effects model).....              | 51 |
| Platelet (PLT) Black vs White female (Fixed-effects model and random-effects model)..... | 52 |
| Platelet (PLT) Black vs White male (subgroup-country of study).....                      | 53 |
| Platelet (PLT) Black vs White male (subgroup-study quality).....                         | 54 |
| Platelet (PLT) Black vs White male (Fixed-effects model and random-effects model).....   | 55 |
| Platelet (PLT) Asian vs White male (Fixed-effects model and random-effects model).....   | 56 |
| Platelet (PLT) Black vs Asian male (Fixed-effects model and random-effects model) .....  | 57 |
| CRP Black vs White female (Fixed-effects model and random-effects model).....            | 58 |

|                                                                                        |    |
|----------------------------------------------------------------------------------------|----|
| CRP Black vs White male (Fixed-effects model and random-effects model) .....           | 59 |
| CRP Asian vs White female (Fixed-effects model and random-effects model) .....         | 60 |
| Calcium Black vs White female (Fixed-effects model and random-effects model) .....     | 61 |
| Calcium Black vs White male (Fixed-effects model and random-effects model) .....       | 61 |
| Albumin (ALB) Black vs White male (Fixed-effects model and random-effects model) ..... | 62 |
| References .....                                                                       | 63 |

## Appendix 1 Preferred Reporting Items for Systematic reviews and Meta-Analyses (PRISMA) checklist

| Section and Topic             | Item # | Checklist item                                                                                                                                                                                                                                                                                       | Location where item is reported |
|-------------------------------|--------|------------------------------------------------------------------------------------------------------------------------------------------------------------------------------------------------------------------------------------------------------------------------------------------------------|---------------------------------|
| <b>TITLE</b>                  |        |                                                                                                                                                                                                                                                                                                      |                                 |
| Title                         | 1      | Identify the report as a systematic review.                                                                                                                                                                                                                                                          | 1                               |
| <b>ABSTRACT</b>               |        |                                                                                                                                                                                                                                                                                                      |                                 |
| Abstract                      | 2      | See the PRISMA 2020 for Abstracts checklist.                                                                                                                                                                                                                                                         | 1-2                             |
| <b>INTRODUCTION</b>           |        |                                                                                                                                                                                                                                                                                                      |                                 |
| Rationale                     | 3      | Describe the rationale for the review in the context of existing knowledge.                                                                                                                                                                                                                          | 3-4                             |
| Objectives                    | 4      | Provide an explicit statement of the objective(s) or question(s) the review addresses.                                                                                                                                                                                                               | 4                               |
| <b>METHODS</b>                |        |                                                                                                                                                                                                                                                                                                      |                                 |
| Eligibility criteria          | 5      | Specify the inclusion and exclusion criteria for the review and how studies were grouped for the syntheses.                                                                                                                                                                                          | 4, 20 (table1)                  |
| Information sources           | 6      | Specify all databases, registers, websites, organisations, reference lists and other sources searched or consulted to identify studies. Specify the date when each source was last searched or consulted.                                                                                            | 5                               |
| Search strategy               | 7      | Present the full search strategies for all databases, registers and websites, including any filters and limits used.                                                                                                                                                                                 | 5, appendix 2                   |
| Selection process             | 8      | Specify the methods used to decide whether a study met the inclusion criteria of the review, including how many reviewers screened each record and each report retrieved, whether they worked independently, and if applicable, details of automation tools used in the process.                     | 5                               |
| Data collection process       | 9      | Specify the methods used to collect data from reports, including how many reviewers collected data from each report, whether they worked independently, any processes for obtaining or confirming data from study investigators, and if applicable, details of automation tools used in the process. | 6                               |
| Data items                    | 10a    | List and define all outcomes for which data were sought. Specify whether all results that were compatible with each outcome domain in each study were sought (e.g. for all measures, time points, analyses), and if not, the methods used to decide which results to collect.                        | 4-6                             |
|                               | 10b    | List and define all other variables for which data were sought (e.g. participant and intervention characteristics, funding sources). Describe any assumptions made about any missing or unclear information.                                                                                         | 4-6                             |
| Study risk of bias assessment | 11     | Specify the methods used to assess risk of bias in the included studies, including details of the tool(s) used, how many reviewers assessed each study and whether they worked independently, and if applicable, details of automation tools used in the process.                                    | 5-6                             |
| Effect measures               | 12     | Specify for each outcome the effect measure(s) (e.g. risk ratio, mean difference) used in the synthesis or presentation of results.                                                                                                                                                                  | 6-7                             |
| Synthesis                     | 13a    | Describe the processes used to decide which studies were eligible for each synthesis (e.g. tabulating the study intervention                                                                                                                                                                         | 6-7                             |

| Section and Topic             | Item # | Checklist item                                                                                                                                                                                                                                                                       | Location where item is reported |
|-------------------------------|--------|--------------------------------------------------------------------------------------------------------------------------------------------------------------------------------------------------------------------------------------------------------------------------------------|---------------------------------|
| methods                       |        | characteristics and comparing against the planned groups for each synthesis (item #5)).                                                                                                                                                                                              |                                 |
|                               | 13b    | Describe any methods required to prepare the data for presentation or synthesis, such as handling of missing summary statistics, or data conversions.                                                                                                                                | 6-7                             |
|                               | 13c    | Describe any methods used to tabulate or visually display results of individual studies and syntheses.                                                                                                                                                                               | 6-7                             |
|                               | 13d    | Describe any methods used to synthesize results and provide a rationale for the choice(s). If meta-analysis was performed, describe the model(s), method(s) to identify the presence and extent of statistical heterogeneity, and software package(s) used.                          | 7                               |
|                               | 13e    | Describe any methods used to explore possible causes of heterogeneity among study results (e.g. subgroup analysis, meta-regression).                                                                                                                                                 | 7                               |
|                               | 13f    | Describe any sensitivity analyses conducted to assess robustness of the synthesized results.                                                                                                                                                                                         | 7                               |
| Reporting bias assessment     | 14     | Describe any methods used to assess risk of bias due to missing results in a synthesis (arising from reporting biases).                                                                                                                                                              | 6-7                             |
| Certainty assessment          | 15     | Describe any methods used to assess certainty (or confidence) in the body of evidence for an outcome.                                                                                                                                                                                | NA                              |
| <b>RESULTS</b>                |        |                                                                                                                                                                                                                                                                                      |                                 |
| Study selection               | 16a    | Describe the results of the search and selection process, from the number of records identified in the search to the number of studies included in the review, ideally using a flow diagram.                                                                                         | 7, 23 (figure1)                 |
|                               | 16b    | Cite studies that might appear to meet the inclusion criteria, but which were excluded, and explain why they were excluded.                                                                                                                                                          | 7, 23 (figure1)                 |
| Study characteristics         | 17     | Cite each included study and present its characteristics.                                                                                                                                                                                                                            | 8-9 Appendix 5                  |
| Risk of bias in studies       | 18     | Present assessments of risk of bias for each included study.                                                                                                                                                                                                                         | 7, 21(table2)                   |
| Results of individual studies | 19     | For all outcomes, present, for each study: (a) summary statistics for each group (where appropriate) and (b) an effect estimate and its precision (e.g. confidence/credible interval), ideally using structured tables or plots.                                                     | 8-10, 22(table3)                |
| Results of syntheses          | 20a    | For each synthesis, briefly summarise the characteristics and risk of bias among contributing studies.                                                                                                                                                                               | 8-14 23(figure2)                |
|                               | 20b    | Present results of all statistical syntheses conducted. If meta-analysis was done, present for each the summary estimate and its precision (e.g. confidence/credible interval) and measures of statistical heterogeneity. If comparing groups, describe the direction of the effect. | 10 Appendix 6                   |
|                               | 20c    | Present results of all investigations of possible causes of heterogeneity among study results.                                                                                                                                                                                       | 8-14                            |

| Section and Topic                              | Item # | Checklist item                                                                                                                                                                                                                             | Location where item is reported |
|------------------------------------------------|--------|--------------------------------------------------------------------------------------------------------------------------------------------------------------------------------------------------------------------------------------------|---------------------------------|
|                                                |        |                                                                                                                                                                                                                                            | Appendix 6                      |
|                                                | 20d    | Present results of all sensitivity analyses conducted to assess the robustness of the synthesized results.                                                                                                                                 | Appendix 6                      |
| Reporting biases                               | 21     | Present assessments of risk of bias due to missing results (arising from reporting biases) for each synthesis assessed.                                                                                                                    | NA                              |
| Certainty of evidence                          | 22     | Present assessments of certainty (or confidence) in the body of evidence for each outcome assessed.                                                                                                                                        | NA                              |
| <b>DISCUSSION</b>                              |        |                                                                                                                                                                                                                                            |                                 |
| Discussion                                     | 23a    | Provide a general interpretation of the results in the context of other evidence.                                                                                                                                                          | 10-11                           |
|                                                | 23b    | Discuss any limitations of the evidence included in the review.                                                                                                                                                                            | 12                              |
|                                                | 23c    | Discuss any limitations of the review processes used.                                                                                                                                                                                      | 12                              |
|                                                | 23d    | Discuss implications of the results for practice, policy, and future research.                                                                                                                                                             | 11-12                           |
| <b>OTHER INFORMATION</b>                       |        |                                                                                                                                                                                                                                            |                                 |
| Registration and protocol                      | 24a    | Provide registration information for the review, including register name and registration number, or state that the review was not registered.                                                                                             | 2                               |
|                                                | 24b    | Indicate where the review protocol can be accessed, or state that a protocol was not prepared.                                                                                                                                             | NA                              |
|                                                | 24c    | Describe and explain any amendments to information provided at registration or in the protocol.                                                                                                                                            | NA                              |
| Support                                        | 25     | Describe sources of financial or non-financial support for the review, and the role of the funders or sponsors in the review.                                                                                                              | 14                              |
| Competing interests                            | 26     | Declare any competing interests of review authors.                                                                                                                                                                                         | 14                              |
| Availability of data, code and other materials | 27     | Report which of the following are publicly available and where they can be found: template data collection forms; data extracted from included studies; data used for all analyses; analytic code; any other materials used in the review. | Appendix                        |

From: Page MJ, McKenzie JE, Bossuyt PM, Boutron I, Hoffmann TC, Mulrow CD, et al. The PRISMA 2020 statement: an updated guideline for reporting systematic reviews. *BMJ* 2021;372:n71. doi: 10.1136/bmj.n71

For more information, visit: <http://www.prisma-statement.org/>

## Appendix 2 Search criteria - Ethnicity and blood test result distribution

### **Blood tests**

1. exp **Prostate-Specific Antigen**/
2. psa\*.ti,ab.
3. prostate specific antigen\*.ti,ab.
4. 1 or 2 or 3
  
5. exp **Platelet Count**/
6. exp **Blood Platelets**/
7. platelet\*.ti,ab.
8. thrombocyt\*.ti,ab.
9. 5 or 6 or 7 or 8
  
10. exp **Hemoglobins**/
11. haemoglobin\*.ti,ab.
12. hemoglobin\*.ti,ab.
13. hb.ti,ab.
14. hgb\*.ti,ab.
15. anemia\*.ti,ab.
16. anaemia\*.ti,ab.
17. 10 or 11 or 12 or 13 or 14 or 15 or 16
  
18. exp **Albumins**/
19. exp **Serum Albumin**/
20. exp **Serum Albumin, Human**/
21. albumin\*.ti,ab.
22. serum albumin\*.ti,ab.
23. blood albumin\*.ti,ab.
24. 18 or 19 or 20 or 21 or 22 or 23
  
25. exp **Calcium**/
26. calcium level\*.ti,ab.
27. hypocalc\*.ti,ab.
28. hypercalc\*.ti,ab.
29. 25 or 26 or 27 or 28
  
30. exp **C-Reactive Protein**/
31. crp\*.ti,ab.
32. c reactive protein\*.ti,ab.
33. 30 or 31 or 32
  
34. exp **CA-125 Antigen**/
35. ca-125\*.ti,ab.
36. ca125\*.ti,ab.
37. cancer antigen 125\*.ti,ab.
38. 34 or 35 or 36 or 37
  
39. **mean corpuscular volume**\*.ti,ab.
40. mcv\*.ti,ab.
41. 39 or 40

- 42. exp **Blood Cell Count/**
- 43. exp **Hematologic Tests/**
- 44. full blood count\*.ti,ab.
- 45. complete blood count\*.ti,ab.
- 46. fbc.ti,ab.
- 47. cbc.ti,ab.
- 48. blood test\*.ti,ab.
- 49. hematolog\* test\*.ti,ab.
- 50. 42 or 43 or 44 or 45 or 46 or 47 or 48 or 49
  
- 51. 4 or 9 or 17 or 24 or 29 or 33 or 38 or 41 or 50

## **Ethnic Groups**

- 52. exp **African Continental Ancestry Group/**
- 53. African\*.ti,ab.
- 54. Negro\*.ti,ab.
- 55. Afro\*.ti,ab.
- 56. Black adj3 ethnic\*.ti,ab.
- 57. Black adj3 race\*.ti,ab.
- 58. Black adj3 racial\*.ti,ab.
- 59. 52 or 53 or 54 or 55 or 56 or 57 or 58
  
- 60. exp **European Continental Ancestry Group/**
- 61. Caucas\*.ti,ab.
- 62. Europ\*.ti,ab.
- 63. White adj3 ethnic\*.ti,ab.
- 64. White adj3 race\*.ti,ab.
- 65. White adj3 racial\*.ti,ab.
- 66. 60 or 61 or 62 or 63 or 64 or 65
  
- 67. exp **Asian Continental Ancestry Group/**
- 68. Asian\*.ti,ab.
- 69. Indian\*.ti,ab.
- 70. Pakistani\*.ti,ab.
- 71. Bangladeshi\*.ti,ab.
- 72. Bengalis\*.ti,ab.
- 73. Kashmiris\*.ti,ab.
- 74. Gujaratis\*.ti,ab.
- 75. Tamils\*.ti,ab.
- 76. Sri Lankan\*.ti,ab.
- 77. Chinese\*.ti,ab.
- 78. Japanese\*.ti,ab.
- 79. Oriental\*.ti,ab.
- 80. Thai\*.ti,ab.
- 81. Phillipino\*.ti,ab.
- 82. Filipino\*.ti,ab.
- 83. Taiwanese\*.ti,ab.



84. 67 or 68 or 69 or 70 or 71 or 72 or 73 or 74 or 75 or 76 or 77 or 78 or 79 or 80 or 81 or 82 or 83

85. exp **American Native Continental Ancestry Group/**

- 86. Native American\*.ti,ab.
- 87. Native Canadian\*.ti,ab.
- 88. Native Alaskan\*.ti,ab.
- 89. American Native\*.ti,ab.
- 90. Canadian Native\*.ti,ab.
- 91. Alaskan Native\*.ti,ab.
- 92. 85 or 86 or 87 or 88 or 89 or 90 or 91

93. exp **Oceanic Ancestry Group**

- 94. Aborigin\*.ti,ab.
- 95. Indigenous p\*.ti,ab.
- 96. Maori\*.ti,ab.
- 97. Pacific Island\*.ti,ab.
- 98. 93 or 94 or 95 or 96 or 97

99. Inuit\*.ti,ab.

- 100. Eskimo\*.ti,ab.
- 101. Aleut\*.ti,ab.
- 102. 99 or 100 or 101

- 103. Arab\*.ti,ab.
- 104. Bedouin\*.ti,ab.
- 105. Semit\*.ti,ab.
- 106. Jew\*.ti,ab.
- 107. Israeli\*.ti,ab.
- 108. 103 or 104 or 105 or 106 or 107

- 109. Hispanic\*.ti,ab.
- 110. Latino\*.ti,ab.
- 111. 109 or 110

- 112. 59 and 66
- 113. 59 and 84
- 114. 59 and 92
- 115. 59 and 98
- 116. 59 and 102
- 117. 59 and 108
- 118. 59 and 111
- 119. 84 and 92
- 120. 84 and 98
- 121. 84 and 102
- 122. 84 and 108
- 123. 84 and 111
- 124. 92 and 98
- 125. 92 and 102
- 126. 92 and 108
- 127. 92 and 111

- 128. 98 and 102
- 129. 98 and 108
- 130. 98 and 111
- 131. 102 and 108
- 132. 102 and 111
- 133. 108 and 111
- 134. 112 or 113 or 114 or 115 or 116 or 117 or 118 or 119 or 120 or 121 or 122 or 123 or 124 or 125 or 126 or 127 or 128 or 129 or 130 or 131 or 132 or 133

- 135. exp **Ethnic Groups/**
- 136. exp **Minority Groups/**
- 137. ethnic\*.ti,ab.
- 138. race\*.ti,ab.
- 139. racial\*.ti,ab.
- 140. 137 or 138 or 139
- 141. inter\*.ti,ab. and 140
- 142. intra\*.ti,ab. and 140
- 143. difference\*.ti,ab. and 140
- 144. 135 or 136 or 141 or 142 or 143

- 145. 134 or 144

**Combine**

- 146. 51 and 145

**Reference intervals**

- 147. exp Reference Values/
- 148. exp Reference Standards/
- 149. reference value\*.ti,ab.
- 150. reference range\*.ti,ab.
- 151. reference interval\*.ti,ab.
- 152. reference standard\*.ti,ab.
- 153. distribution\*.ti,ab.
- 154. 147 or 148 or 149 or 150 or 151 or 152 or 153

**Combine**

- 155. 145 and 154

Note:

PSA was included in the search. Then papers reported PSA test were excluded from search result at the screening stage. The result of PSA test has been published elsewhere:

M. Barlow, L. Down, L. T. A. Mounce, S. W. D. Merriel, J. Watson, T. Martins and S. E. R. Bailey. Ethnic differences in prostate-specific antigen levels in men without prostate cancer: a systematic review. Prostate Cancer Prostatic Dis. 2023;26(2):249-256.

Appendix 3 Data extraction form

**EPIC Study**  
**Systematic Review Data Extraction Form**

Study ID:

Based on <https://dplp.cochrane.org/data-extraction-forms>

**General**

|      |                              |  |
|------|------------------------------|--|
| 1.1. | Study ( <i>author year</i> ) |  |
| 1.2. | Reviewer                     |  |
| 1.3. | Date form completed          |  |

**Methods**

|      | Descriptions as stated in report/paper | Location in text or source |
|------|----------------------------------------|----------------------------|
| 2.1. | Database or study name                 |                            |
| 2.2. | Date of blood tests                    |                            |

2.3. Notes:

**Participants**

|      | Description                                                                       | Location in text or source |
|------|-----------------------------------------------------------------------------------|----------------------------|
| 3.1. | Country of study                                                                  |                            |
| 3.2. | Classification into EPIC's ethnic groups ( <i>e.g. African-American = Black</i> ) |                            |
| 3.3. | Ethnic distribution (n)                                                           |                            |
| 3.4. | Assignment of ethnicity ( <i>self-reported?</i> )                                 |                            |
| 3.5. | Blood tests reported in study                                                     |                            |

3.6. Notes:

**Outcomes**

|      | <b>Blood test 1</b>                                                                                  | <b>Description as stated in report/paper</b>                                           | <b>Location in text or source (pg &amp; ¶/fig/table/other)</b> |
|------|------------------------------------------------------------------------------------------------------|----------------------------------------------------------------------------------------|----------------------------------------------------------------|
| 4.1. | Blood test                                                                                           |                                                                                        |                                                                |
| 4.2. | Blood test units                                                                                     |                                                                                        |                                                                |
| 4.3. | Summary statistic reported<br><i>(e.g. mean±SD, proportion high/low, raw values)</i>                 |                                                                                        |                                                                |
| 4.4. | Blood test result <i>(stratify by ethnic group)</i><br><br>White<br>Black<br>Asian<br>Other<br>Mixed | <i>Please include values for all reported summary statistics for each ethnic group</i> |                                                                |
|      |                                                                                                      |                                                                                        |                                                                |
|      |                                                                                                      |                                                                                        |                                                                |
|      |                                                                                                      |                                                                                        |                                                                |
|      |                                                                                                      |                                                                                        |                                                                |
| 4.5. | Outcome summary <i>(e.g. White &gt; Black &gt; Asian)</i>                                            |                                                                                        |                                                                |
| 4.6. | Statistical significance                                                                             |                                                                                        |                                                                |
| 4.7. | Notes:                                                                                               |                                                                                        |                                                                |

### Outcomes

|      | <b>Blood test 2</b>                                                                                  | <b>Description as stated in report/paper</b>                                           | <b>Location in text or source (pg &amp; ¶/fig/table/other)</b> |
|------|------------------------------------------------------------------------------------------------------|----------------------------------------------------------------------------------------|----------------------------------------------------------------|
| 5.1. | Blood test                                                                                           |                                                                                        |                                                                |
| 5.2. | Blood test units                                                                                     |                                                                                        |                                                                |
| 5.3. | Summary statistic reported<br><i>(e.g. mean±SD, proportion high/low, raw values)</i>                 |                                                                                        |                                                                |
| 5.4. | Blood test result <i>(stratify by ethnic group)</i><br><br>White<br>Black<br>Asian<br>Other<br>Mixed | <i>Please include values for all reported summary statistics for each ethnic group</i> |                                                                |
|      |                                                                                                      |                                                                                        |                                                                |
|      |                                                                                                      |                                                                                        |                                                                |
|      |                                                                                                      |                                                                                        |                                                                |
|      |                                                                                                      |                                                                                        |                                                                |
| 5.5. | Outcome summary <i>(e.g. White &gt; Black &gt; Asian)</i>                                            |                                                                                        |                                                                |

5.6. Statistical significance 

|  |  |
|--|--|
|  |  |
|--|--|

5.7. Notes: 

|  |
|--|
|  |
|--|

|      | <b>Blood test 3</b>                                                        | Description as stated in report/paper                                                  | Location in text or source (pg & ¶/fig/table/other) |
|------|----------------------------------------------------------------------------|----------------------------------------------------------------------------------------|-----------------------------------------------------|
| 6.1. | Blood test                                                                 |                                                                                        |                                                     |
| 6.2. | Blood test units                                                           |                                                                                        |                                                     |
| 6.3. | Summary statistic reported (e.g. mean±SD, proportion high/low, raw values) |                                                                                        |                                                     |
| 6.4. | Blood test result (stratify by ethnic group)                               | <i>Please include values for all reported summary statistics for each ethnic group</i> |                                                     |
|      |                                                                            | White                                                                                  |                                                     |
|      |                                                                            | Black                                                                                  |                                                     |
|      |                                                                            | Asian                                                                                  |                                                     |
|      |                                                                            | Other                                                                                  |                                                     |
|      |                                                                            | Mixed                                                                                  |                                                     |
| 6.5. | Outcome summary (e.g. White > Black > Asian)                               |                                                                                        |                                                     |
| 6.6. | Statistical significance                                                   |                                                                                        |                                                     |

6.7. Notes: 

|  |
|--|
|  |
|--|

Copy and paste the above tables if more than three blood tests per paper

Appendix 4 Adapted Newcastle- Ottawa scale

| <b>Risk of Bias Assessment - Newcastle-Ottawa Quality Assessment Scale for Cohort Studies (adapted for EPIC)</b> |                                             |                                                                                                       |  |  |
|------------------------------------------------------------------------------------------------------------------|---------------------------------------------|-------------------------------------------------------------------------------------------------------|--|--|
| <i>Questions to be awarded with a maximum of one star, if appropriate, unless otherwise stated.</i>              |                                             |                                                                                                       |  |  |
| <b>Selection</b>                                                                                                 |                                             |                                                                                                       |  |  |
| 1.1.                                                                                                             | Representativeness of the exposed cohort    | a) truly representative of a general / healthy population *                                           |  |  |
|                                                                                                                  |                                             | b) somewhat representative of a general / healthy population *                                        |  |  |
|                                                                                                                  |                                             | c) selected group of participants e.g. hospital workers, marathon runners etc.                        |  |  |
|                                                                                                                  |                                             | d) no description of the derivation of the cohort                                                     |  |  |
| 1.2.                                                                                                             | Selection of ethnic groups                  | a) drawn from the same community / database *                                                         |  |  |
|                                                                                                                  |                                             | b) drawn from a different source                                                                      |  |  |
|                                                                                                                  |                                             | c) no description of the derivation of the ethnic groups                                              |  |  |
| 1.3.                                                                                                             | Ascertainment of ethnicity                  | a) Self-report *                                                                                      |  |  |
|                                                                                                                  |                                             | b) Extracted from medical records (if evidence the ethnicity originally came from self report) *      |  |  |
|                                                                                                                  |                                             | c) Determined by clinician or researcher, or no evidence to suggest ethnicity came from a self report |  |  |
|                                                                                                                  |                                             | c) No description                                                                                     |  |  |
| 1.4.                                                                                                             | Sample size                                 | a) calculated and described *                                                                         |  |  |
|                                                                                                                  |                                             | b) not calculated or not described                                                                    |  |  |
| <b>Comparability</b>                                                                                             |                                             |                                                                                                       |  |  |
| 2.1.                                                                                                             | Comparability                               | a) study controls for sex *                                                                           |  |  |
|                                                                                                                  | <i>Maximum of two stars for this domain</i> | b) study controls for age *                                                                           |  |  |

|                |                                                                                   |                                                                                                                                                                       |     |                      |
|----------------|-----------------------------------------------------------------------------------|-----------------------------------------------------------------------------------------------------------------------------------------------------------------------|-----|----------------------|
|                |                                                                                   | c) study controls for any additional factor                                                                                                                           |     |                      |
|                |                                                                                   |                                                                                                                                                                       |     |                      |
| <b>Outcome</b> |                                                                                   |                                                                                                                                                                       |     |                      |
| 3.1.           | Ascertainment of blood test                                                       | a) secure records (e.g. medical records, laboratory results) *                                                                                                        |     |                      |
|                |                                                                                   | b) self-report                                                                                                                                                        |     |                      |
|                |                                                                                   | e) no statement                                                                                                                                                       |     |                      |
|                |                                                                                   |                                                                                                                                                                       |     |                      |
| 3.2.           | Statistical test to compare differences in blood test values across ethnic groups | a) clearly described and appropriate, and the measurement of the association is presented with the probability level (p value), CIs, or mean±SD (to calculate CIs) ** |     |                      |
|                | <i>Maximum of two stars for this question</i>                                     | b) statistical test used and p-value, CIs or mean±SD provided, but absent or unclear description of the statistical test used*                                        |     |                      |
|                |                                                                                   | c) the statistical test is not appropriate, not described, or incomplete                                                                                              |     |                      |
|                |                                                                                   |                                                                                                                                                                       |     |                      |
| 4.             | Notes:                                                                            |                                                                                                                                                                       |     |                      |
|                |                                                                                   |                                                                                                                                                                       |     |                      |
| 5.             | Risk of bias scoring:                                                             |                                                                                                                                                                       |     | Good, fair, or poor? |
|                | Selection                                                                         |                                                                                                                                                                       | / 4 |                      |
|                | Comparability                                                                     |                                                                                                                                                                       | / 2 |                      |
|                | Outcome                                                                           |                                                                                                                                                                       | / 3 |                      |
|                |                                                                                   |                                                                                                                                                                       |     |                      |
|                |                                                                                   | <u>Thresholds for converting the Newcastle-Ottawa scales to AHRQ standards (good, fair, and poor):</u>                                                                |     |                      |
|                |                                                                                   | <b>Good quality:</b> 3 or 4 stars in selection domain AND 1 or 2 stars in comparability domain AND 2 or 3 stars in outcome/exposure domain                            |     |                      |
|                |                                                                                   | <b>Fair quality:</b> 2 stars in selection domain AND 1 or 2 stars in comparability domain AND 2 or 3 stars in outcome/exposure domain                                 |     |                      |
|                |                                                                                   | <b>Poor quality:</b> 0 or 1 star in selection domain OR 0 stars in comparability domain OR 0 or 1 stars in outcome/exposure domain                                    |     |                      |

Appendix 5 Study characteristics and summary of results by blood tests

| Study ID                    | Blood tests    | Dataset /study name                                                | Country of study | Age (years)                                                                        | Stat                     | Subgroup             | Ethnic distribution              |                                                                                                                                    |       |              |       | Quality | Covariates                                                                   |
|-----------------------------|----------------|--------------------------------------------------------------------|------------------|------------------------------------------------------------------------------------|--------------------------|----------------------|----------------------------------|------------------------------------------------------------------------------------------------------------------------------------|-------|--------------|-------|---------|------------------------------------------------------------------------------|
|                             |                |                                                                    |                  |                                                                                    |                          |                      | White                            | Asian                                                                                                                              | Black | Other        | Mixed |         |                                                                              |
| #Beutler_2005 <sup>1</sup>  | Hb             | NR                                                                 | USA              | Mean:<br>Female-<br>White 57.6,<br>Black 49.8<br>Male-White<br>57.6, Black<br>51.0 | Count                    | Female               | 15624                            |                                                                                                                                    |       | 760          |       | Poor    | Mean difference: 0.6 g/dL in age matched and iron deficiency excluded subset |
|                             |                |                                                                    |                  |                                                                                    |                          | Male                 | 15405                            |                                                                                                                                    |       | 733          |       |         |                                                                              |
|                             |                |                                                                    |                  |                                                                                    | Result: g/dL (mean (SE)) | Female               | 13.49 (0.01)                     |                                                                                                                                    |       | 12.7 (0.04)  |       |         |                                                                              |
|                             |                |                                                                    |                  |                                                                                    |                          | Male                 | 14.93 (0.01)                     |                                                                                                                                    |       | 14.45 (0.04) |       |         |                                                                              |
| Outcome summary             | Female<br>Male | White> Black (African-American)<br>White> Black (African-American) |                  |                                                                                    |                          |                      |                                  |                                                                                                                                    |       |              |       |         |                                                                              |
| #Buckle_1978 <sup>2</sup>   | Hb             | NR                                                                 | South Africa     | Range: 18-50                                                                       | Count                    | Female               | 219                              | 93                                                                                                                                 |       | 893          |       | Poor    |                                                                              |
|                             |                |                                                                    |                  |                                                                                    |                          | Male                 | 504                              | 611                                                                                                                                |       | 2250         |       |         |                                                                              |
|                             |                |                                                                    |                  |                                                                                    | Result: g/dL (mean (SD)) | Female               | 13.32 (0.98)                     | 12.56 (0.85)                                                                                                                       |       | 12.87 (1.12) |       |         |                                                                              |
|                             |                |                                                                    |                  |                                                                                    |                          | Male                 | 15.16 (0.97)                     | 15.34 (1.25)                                                                                                                       |       | 14.39 (1.21) |       |         |                                                                              |
| Outcome summary             | Female<br>Male | White (Caucasian) >Black >Asian;<br>Asian>White (Caucasian) >Black |                  |                                                                                    |                          |                      |                                  |                                                                                                                                    |       |              |       |         |                                                                              |
| #Cheng_2004 <sup>3</sup>    | Hb             | NHANE S III                                                        | USA              | Range: 18 - 75                                                                     | Count                    | Female               | 1937                             |                                                                                                                                    |       | 1048         | 1185  | Poor    |                                                                              |
|                             |                |                                                                    |                  |                                                                                    |                          | Male                 | 1188                             |                                                                                                                                    |       | 564          | 550   |         |                                                                              |
|                             |                |                                                                    |                  |                                                                                    | Result                   | Female<br>Male       | No numerical result was reported |                                                                                                                                    |       |              |       |         |                                                                              |
|                             |                |                                                                    |                  |                                                                                    |                          | Outcome summary      | Female<br>Male                   | No evidence of difference was reported between White (Non-Hispanic White); Black (Non-Hispanic black) and Other (Mexican American) |       |              |       |         |                                                                              |
| #Godsland_1983 <sup>4</sup> | Hb             | NR                                                                 | UK               | Range: 16-45                                                                       | Count                    | Female (non-OC user) | 69                               | 117 (Oriental)+109 (Indian)                                                                                                        | 123   |              | Fair  | OC user |                                                                              |
|                             |                |                                                                    |                  |                                                                                    |                          | Female (OC user)     | 84                               | 59 (Oriental)+79 (Indian)                                                                                                          | 142   |              |       |         |                                                                              |



| Study ID                       | Blood tests | Dataset /study name | Country of study | Age (years)                  | Stat                                  | Subgroup             | Ethnic distribution                                                                                                                                              |                                                          |                            |                            |       | Quality | Covariates                                            |
|--------------------------------|-------------|---------------------|------------------|------------------------------|---------------------------------------|----------------------|------------------------------------------------------------------------------------------------------------------------------------------------------------------|----------------------------------------------------------|----------------------------|----------------------------|-------|---------|-------------------------------------------------------|
|                                |             |                     |                  |                              |                                       |                      | White                                                                                                                                                            | Asian                                                    | Black                      | Other                      | Mixed |         |                                                       |
|                                |             |                     |                  |                              | Result: g/dL (mean (range))           | Female (non-OC user) | 12.9 (11.3 - 15)                                                                                                                                                 | 12.46 (8.9 - 14.5 Oriental) & 12.36 (8.7 - 14.9 Indian)  | 12.46 (8.9 - 14.5)         |                            |       |         |                                                       |
|                                |             |                     |                  |                              |                                       | Female (OC user)     | 12.8 (11.2 - 14.9)                                                                                                                                               | 12.52 (10.2 - 14.2 Oriental) & 12.58 (9.8 - 14.1 Indian) | 12.52 (10.2 - 14.2)        |                            |       |         |                                                       |
|                                |             |                     |                  |                              | Outcome summary                       | Female (Total)       | White > Black and Asian (Indian) and Asian (Oriental), Oriental>Indian                                                                                           |                                                          |                            |                            |       |         |                                                       |
| #Hollo well_2 005 <sup>5</sup> | Hb          | NHAES III           | USA              | Range: 20 -70 years and over | Count                                 | Female<br>Male       | 3642<br>3147                                                                                                                                                     |                                                          | 2400<br>2961               | 2166<br>3170               |       | Good    | Age group weight adjusted                             |
|                                |             |                     |                  |                              | Result: g/dL (mean (SD))              | Female<br>Male       | 13.45 (1.1)<br>14.94 (1.1)                                                                                                                                       |                                                          | 12.53 (1.2)<br>14.38 (1.2) | 13.2 (1.2)<br>15.22 (1.1)  |       |         |                                                       |
|                                |             |                     |                  |                              | Outcome summary                       | Female<br>Male       | White (Non-Hispanic White)>Other (Mexican American)>Black (Non-Hispanic Black)<br>Other (Mexican American)>White (Non-Hispanic White)>Black (Non-Hispanic Black) |                                                          |                            |                            |       |         |                                                       |
| #Horn_ 2002 <sup>6</sup>       | Hb          | NHANE S III         | USA              | NR                           | Count                                 | Female<br>Male       | 1279<br>1032                                                                                                                                                     |                                                          | 842<br>734                 | 909<br>1000                |       | Poor    |                                                       |
|                                |             |                     |                  |                              | Result: g/dL (95% reference interval) | Female<br>Male       | 11.5 - 15.3<br>13.4 - 16.8                                                                                                                                       |                                                          | 10.6 - 14.5<br>12.7 - 16.7 | 11.2 - 15.0<br>13.6 - 17.2 |       |         |                                                       |
|                                |             |                     |                  |                              | Outcome summary                       | Female<br>Male       | White (Non-Hispanic White)>Black (Non-Hispanic Black)<br>Other (Mexican American) > Black (Non-Hispanic Black)                                                   |                                                          |                            |                            |       |         |                                                       |
| #Jacks on 1992 <sup>7</sup>    | Hb          | NHANE S II          | USA              | Range: 18-49                 | Count                                 | Male                 | 2394                                                                                                                                                             |                                                          | 303                        |                            |       | Good    | Hb below normal (13g/dl) were removed from the sample |
|                                |             |                     |                  |                              | Result: g/dL (mean (SD))              | Male                 | 15.3 (1.0)                                                                                                                                                       |                                                          | 14.58 (1.18)               |                            |       |         |                                                       |
|                                |             |                     |                  |                              | Outcome summary                       | Male                 | White (European American)>Black (African American)                                                                                                               |                                                          |                            |                            |       |         |                                                       |
| #Jim_1 987 <sup>8</sup>        | Hb          | NR                  | USA              | 20-40 majority               | Count                                 | Female<br>Male       | 43<br>70                                                                                                                                                         | 33 (Chinese) + 72 (Filipino) + 41 (Japanese)             |                            |                            |       | Poor    |                                                       |
|                                |             |                     |                  |                              |                                       |                      |                                                                                                                                                                  | 78 (Chinese) + 81 (Filipino) + 70 (Japanese)             |                            |                            |       |         |                                                       |

| Study ID                          | Blood tests | Dataset /study name | Country of study | Age (years)  | Stat                          | Subgroup                    | Ethnic distribution                                    |                                                                                        |       |                          |       | Quality | Covariates                                                                        |
|-----------------------------------|-------------|---------------------|------------------|--------------|-------------------------------|-----------------------------|--------------------------------------------------------|----------------------------------------------------------------------------------------|-------|--------------------------|-------|---------|-----------------------------------------------------------------------------------|
|                                   |             |                     |                  |              |                               |                             | White                                                  | Asian                                                                                  | Black | Other                    | Mixed |         |                                                                                   |
|                                   |             |                     |                  |              | Result: g/dL (Median (range)) | Female                      | 13.5 (11.2 - 15.9)                                     | 13.1 (11.3 - 14.3 Chinese) & 13.1 (10.9 - 15.2 Filipino) & 13.4 (11.2 - 15.7 Japanese) |       |                          |       |         |                                                                                   |
|                                   |             |                     |                  |              |                               | Male                        | 14.9 (13.2 - 16.1)                                     | 14.8 (13.5 - 16.1 Chinese) & 15.2 (13.2 - 17.4 Filipino) & 15.7 (13.6 - 18 Japanese)   |       |                          |       |         |                                                                                   |
|                                   |             |                     |                  |              | Outcome summary               | Female<br>Male              | No evidence of difference<br>No evidence of difference |                                                                                        |       |                          |       |         |                                                                                   |
| #Johns on-spear_1994 <sup>9</sup> | Hb          | NHANE S II          | USA              | Range: 18-44 | Count                         | Female                      | 2301                                                   |                                                                                        |       | 388                      |       | Poor    | Mean remained the same after adjusting for education, income, smoking iron status |
|                                   |             |                     |                  |              | Result: g/dL (mean (SD))      | Female                      | 13.4 (1.0)                                             |                                                                                        |       | 12.6 (1.2)               |       |         |                                                                                   |
|                                   |             |                     |                  |              | Outcome summary               | Female                      | White>Black                                            |                                                                                        |       |                          |       |         |                                                                                   |
| #Kerr_1982 <sup>10</sup>          | Hb          | HANES I             | USA              | Range: 18-75 | Count                         | 18-44 yr:<br>Female<br>Male | 3773<br>1838                                           |                                                                                        |       | 931<br>330               |       | Poor    |                                                                                   |
|                                   |             |                     |                  |              |                               | 45-75yr total               | 5116                                                   |                                                                                        |       | 1008                     |       |         |                                                                                   |
|                                   |             |                     |                  |              | Result: g/dL (mean (SE))      | 18-44 yr:<br>Female<br>Male | 11.5 (0.4)<br>11.3 (0.4)                               |                                                                                        |       | 10.9 (0.6)<br>10.9 (0.6) |       |         |                                                                                   |
|                                   |             |                     |                  |              |                               | 45-75yr total               | 11.5 (0.2)                                             |                                                                                        |       | 10.8 (0.6)               |       |         |                                                                                   |

| Study ID                       | Blood tests | Dataset /study name | Country of study | Age (years)  | Stat                                                 | Subgroup                    | Ethnic distribution                                                                                                                                                                                           |       |                           |                        |       | Quality | Covariates |
|--------------------------------|-------------|---------------------|------------------|--------------|------------------------------------------------------|-----------------------------|---------------------------------------------------------------------------------------------------------------------------------------------------------------------------------------------------------------|-------|---------------------------|------------------------|-------|---------|------------|
|                                |             |                     |                  |              |                                                      |                             | White                                                                                                                                                                                                         | Asian | Black                     | Other                  | Mixed |         |            |
|                                |             |                     |                  |              | Outcome summary                                      | 18-44 yr:<br>Female<br>Male | White (Hispanic included)>Black;<br>White (Hispanic included)>Black                                                                                                                                           |       |                           |                        |       |         |            |
|                                |             |                     |                  |              |                                                      | 45-75yr total               | White (Hispanic included)>Black                                                                                                                                                                               |       |                           |                        |       |         |            |
| #Kozliti na_2012 <sup>11</sup> | Hb          | Dallas Heart Study  | USA              | Range: 18-85 | Count                                                | Total                       | 1065                                                                                                                                                                                                          |       | 1633                      | 459                    |       | Good    |            |
|                                |             |                     |                  |              | Result: (% Anaemia (<12g/dL))                        | Female<br>Male              | 7.1<br>0.8                                                                                                                                                                                                    |       | 30<br>4.5                 | 14.1<br>0.5            |       |         |            |
|                                |             |                     |                  |              | Outcome summary                                      | Total                       | Anaemia was more common in Black (African) when comparing with White (European American) and Other (Hispanic) respectively; and more common in Other (Hispanic) when comparing with White (European American) |       |                           |                        |       |         |            |
| #Lawrie_2009 <sup>12</sup>     | Hb          | Ours                | South Africa     | Average 41   | Count                                                | Female                      |                                                                                                                                                                                                               |       | 372                       | 218                    |       | Fair    |            |
|                                |             |                     |                  |              | Result: g/dL (2.5% - 97.5% percentile)               | Female                      |                                                                                                                                                                                                               |       | 11.6 - 16.1               | 11.6 -16.8             |       |         |            |
|                                |             |                     |                  |              | Outcome summary                                      | Female                      | Other (Combined Asian, coloured and Caucasian)>Black                                                                                                                                                          |       |                           |                        |       |         |            |
| #Le_2016 <sup>13</sup>         | Hb          | NHANES 2003-2012    | USA              | Range: 30-85 | Count                                                | Total                       | 16157                                                                                                                                                                                                         |       | 9826                      | 12156                  |       | Good    |            |
|                                |             |                     |                  |              | Result: g/dL (mean (SD) of % Anaemia^ in age groups) | Female<br>Male              | 10.0 (4.3)<br>10.8 (3.9)                                                                                                                                                                                      |       | 24.3 (6.7)<br>14.6 (10.9) | 11.9(2.8)<br>5.3 (3.9) |       |         |            |
|                                |             |                     |                  |              | Outcome summary                                      | Female                      | Anaemia was more common in Black (Non-Hispanic Black) and Other (Hispanic) compared with White (Non-Hispanic White)                                                                                           |       |                           |                        |       |         |            |
|                                |             |                     |                  |              |                                                      | Male                        | Anaemia was more common in Black (Non-Hispanic Black) and Other (Hispanic) compared with White (Non-Hispanic White)                                                                                           |       |                           |                        |       |         |            |

| Study ID                   | Blood tests | Dataset /study name | Country of study | Age (years)           | Stat                   | Subgroup                       | Ethnic distribution |                                                                                            |                              |                                                                        |       | Quality | Covariates |
|----------------------------|-------------|---------------------|------------------|-----------------------|------------------------|--------------------------------|---------------------|--------------------------------------------------------------------------------------------|------------------------------|------------------------------------------------------------------------|-------|---------|------------|
|                            |             |                     |                  |                       |                        |                                | White               | Asian                                                                                      | Black                        | Other                                                                  | Mixed |         |            |
| #Mast_2012 <sup>14</sup>   | Hb          | REDS-II and NHANES  | USA              | Range: 18-70 and over | Count                  | Total: REDS-II                 | 31127               |                                                                                            | 1803                         | 1913 (Hispanic)+ 1913 (Other)                                          |       | Fair    |            |
|                            |             |                     |                  |                       |                        | NHANES                         | 7270                |                                                                                            | 1128                         | 1282 (Hispanic)+ 584 (Other)                                           |       |         |            |
|                            |             |                     |                  |                       |                        | Female: REDS-II NHANES         | Reference           |                                                                                            | -0.48 (0.02)<br>-0.13 (0.05) | Hispanic: -0.15 (0.02), -0.4(0.05) & Other: -0.1 (0.02) -0.29 (0.07)   |       |         |            |
|                            |             |                     |                  |                       |                        | Male: REDS-II NHANES           |                     |                                                                                            | -0.29 (0.03)<br>-0.89 (0.05) | Hispanic: -0.14 (0.03), 0.01 (0.05)& Other: -0.07 (0.03) -0.12 ( 0.07) |       |         |            |
|                            |             |                     |                  | Outcome summary       | Female: REDS-II NHANES | White > Hispanic/Other > Black |                     |                                                                                            |                              |                                                                        |       |         |            |
|                            |             |                     |                  |                       | Male: REDS-II NHANES   | White > Hispanic/Other > Black |                     |                                                                                            |                              |                                                                        |       |         |            |
| #Miller_1988 <sup>15</sup> | Hb          | NR                  | UK               | Range: 45-54          | Count                  | Male                           | 68                  | 75                                                                                         | 24                           |                                                                        |       | Fair    |            |
|                            |             |                     |                  |                       |                        | Result: g/dL (mean (SD))       | Male                | 15.5 (1.0)                                                                                 | 15.3 (1.2)                   | 14.7 (1.1)                                                             |       |         |            |
|                            |             |                     |                  |                       |                        | Outcome summary                | Male                | No evidence of difference between White (European), Asian (Indian) and Black (West Indian) |                              |                                                                        |       |         |            |
| #Pan_2008 <sup>16</sup>    | Hb          | NHANES III          | USA              | Range: 20--65         | Count                  | Male                           | 1905                |                                                                                            | 1600                         |                                                                        | Good  |         |            |
|                            |             |                     |                  |                       |                        | Result: g/dL (mean (SE))       | Male                | 15.3 (<0.1)                                                                                |                              | 14.6 (<0.1)                                                            |       |         |            |
|                            |             |                     |                  |                       |                        | Outcome summary                | Male                | White (Non- Hispanic White) >Black (Non-Hispanic Black)                                    |                              |                                                                        |       |         |            |

| Study ID                    | Blood tests | Dataset /study name | Country of study | Age (years)                                                       | Stat                               | Subgroup | Ethnic distribution                                                                                                                                       |             |            |                                                                                  |            | Quality                                                                     | Covariates |
|-----------------------------|-------------|---------------------|------------------|-------------------------------------------------------------------|------------------------------------|----------|-----------------------------------------------------------------------------------------------------------------------------------------------------------|-------------|------------|----------------------------------------------------------------------------------|------------|-----------------------------------------------------------------------------|------------|
|                             |             |                     |                  |                                                                   |                                    |          | White                                                                                                                                                     | Asian       | Black      | Other                                                                            | Mixed      |                                                                             |            |
| #Smit_2019 <sup>17</sup>    | Hb          | NR                  | South Africa     | Range: 18-65                                                      | Count                              | Female   | 286                                                                                                                                                       |             | 33         |                                                                                  | 142        | Fair                                                                        |            |
|                             |             |                     |                  |                                                                   |                                    | Male     | 141                                                                                                                                                       |             | 32         |                                                                                  | 77         |                                                                             |            |
|                             |             |                     |                  |                                                                   | Result: g/dL (mean (SD))           | Female   | 14.0 (1.6)                                                                                                                                                |             | 13.5 (1.3) |                                                                                  | 13.6 (1.3) |                                                                             |            |
|                             |             |                     |                  |                                                                   |                                    | Male     | 13.4 (1.4)                                                                                                                                                |             | 13.2 (2)   |                                                                                  | 13.4 (1.1) |                                                                             |            |
|                             |             |                     |                  |                                                                   | Outcome summary                    | Female   | No evidence of difference between White (Caucasian), Black(African) and Mixed group                                                                       |             |            |                                                                                  |            |                                                                             |            |
| #Thomson_2011 <sup>18</sup> | Hb          | WHI-OS              | USA              | Range: 50-79                                                      | Count                              | Female   | 61101                                                                                                                                                     | 2218        | 5413       | 290 (American Indian or Alaskan Native)+ 2794 (Hispanic or Latino)+ 816 (Other)  | Good       | Post menopause                                                              |            |
|                             |             |                     |                  |                                                                   |                                    | Male     |                                                                                                                                                           |             |            |                                                                                  |            |                                                                             |            |
|                             |             |                     |                  |                                                                   | Result: g/dL (% Anaemia (<12g/dL ) | Female   | 4.5                                                                                                                                                       | 4.2         | 16.3       | 6.9 (American Indian or Alaskan Native) & 5.6 (Hispanic or Latino) & 6.9 (Other) |            |                                                                             |            |
|                             |             |                     |                  |                                                                   |                                    | Male     |                                                                                                                                                           |             |            |                                                                                  |            |                                                                             |            |
|                             |             |                     |                  |                                                                   | Outcome summary                    | Female   | White (Non-Hispanic White) & Asian ( Asian/pacific islander) & Other ( American Indian or Alaskan Native/Hispanic/Latino/ Other)>Black (African American) |             |            |                                                                                  |            |                                                                             |            |
| #Yassin_2022 <sup>19</sup>  | Hb          | NR                  | Qatar            | Range: 18-60                                                      | Count                              | Female   |                                                                                                                                                           | 130         | 95         | 225                                                                              | Poor       |                                                                             |            |
|                             |             |                     |                  |                                                                   |                                    | Male     |                                                                                                                                                           | 355         | 160        | 515                                                                              |            |                                                                             |            |
|                             |             |                     |                  |                                                                   | Result: g/dL (mean (SD))           | Female   |                                                                                                                                                           | 12.8 (0.96) | 12.4 (0.9) | 12.7 (1.0)                                                                       |            |                                                                             |            |
|                             |             |                     |                  |                                                                   |                                    | Male     |                                                                                                                                                           | 14.9 (1.3)  | 14.5 (1.2) | 14.7 (1.3)                                                                       |            |                                                                             |            |
|                             |             |                     |                  |                                                                   | Outcome summary                    | Female   | No evidence of difference between Asian, Black (African) and Other (Arab)                                                                                 |             |            |                                                                                  |            |                                                                             |            |
|                             |             |                     |                  |                                                                   |                                    | Male     | Asian>Black (African)                                                                                                                                     |             |            |                                                                                  |            |                                                                             |            |
| #Beutler_2005 <sup>1</sup>  | MCV         | NR                  | USA              | Mean: Female- White 57.6, Black 49.8 Male- White 57.6, Black 51.0 | Count                              | Female   | 15624                                                                                                                                                     |             | 760        |                                                                                  | poor       | Mean difference: -2.7 fL in age matched and iron deficiency excluded subset |            |
|                             |             |                     |                  |                                                                   |                                    | Male     | 15405                                                                                                                                                     |             | 733        |                                                                                  |            |                                                                             |            |
|                             |             |                     |                  |                                                                   | Result: fL (mean (SE))             | Female   | 90.5 (0.04)                                                                                                                                               |             | 86.8 (0.2) |                                                                                  |            |                                                                             |            |
|                             |             |                     |                  |                                                                   |                                    | Male     | 90.7 (0.04)                                                                                                                                               |             | 87.7 (0.2) |                                                                                  |            |                                                                             |            |
|                             |             |                     |                  |                                                                   | Outcome summary                    | Female   | White> Black (African-American)                                                                                                                           |             |            |                                                                                  |            |                                                                             |            |
|                             |             |                     |                  |                                                                   |                                    | Male     | White> Black (African-American)                                                                                                                           |             |            |                                                                                  |            |                                                                             |            |
| #Cheng_2004 <sup>3</sup>    | MCV         | NHANE S III         | USA              | Range: 18 - 75                                                    | Count                              | Female   | 1937                                                                                                                                                      |             | 1048       | 1185                                                                             | Poor       |                                                                             |            |
|                             |             |                     |                  |                                                                   |                                    | Male     | 1188                                                                                                                                                      |             | 564        | 550                                                                              |            |                                                                             |            |

| Study ID                       | Blood tests | Dataset /study name | Country of study | Age (years)                  | Stat                                    | Subgroup                                     | Ethnic distribution                                                                                                                                              |                                                                                                         |                                        |                            |       | Quality                   | Covariates |
|--------------------------------|-------------|---------------------|------------------|------------------------------|-----------------------------------------|----------------------------------------------|------------------------------------------------------------------------------------------------------------------------------------------------------------------|---------------------------------------------------------------------------------------------------------|----------------------------------------|----------------------------|-------|---------------------------|------------|
|                                |             |                     |                  |                              |                                         |                                              | White                                                                                                                                                            | Asian                                                                                                   | Black                                  | Other                      | Mixed |                           |            |
|                                |             |                     |                  |                              | Result                                  | Female<br>Male                               | No numerical result was reported                                                                                                                                 |                                                                                                         |                                        |                            |       |                           |            |
|                                |             |                     |                  |                              | Outcome summary                         | Female<br>Male                               | No evidence of difference was reported between White (Non-Hispanic White); Black (Non-Hispanic black) and Other (Mexican American)                               |                                                                                                         |                                        |                            |       |                           |            |
| #Godsl and_19 83 <sup>4</sup>  | MCV         | NR                  | UK               | Range: 16-45                 | Count                                   | Female (non-OC user)<br><br>Female (OC user) | 69<br><br>84                                                                                                                                                     | 117 (Oriental)+ 109 (Indian)<br><br>59 (Oriental)+ 79 (Indian)                                          | 123<br><br>142                         |                            | Fair  | OC user                   |            |
|                                |             |                     |                  |                              | Result: fL (mean (range))               | Female (non-OC user)<br><br>Female (OC user) | 89.1 (77 -99)<br><br>89.6 (81-101)                                                                                                                               | 88.7 (75 - 101 Oriental) & 85.3 (69 - 99 Indian)<br><br>89.3 (81 - 96 Oriental) & 85.7 (69 - 97 Indian) | 86.3 (65 - 100)<br><br>86.9 (73 - 101) |                            |       |                           |            |
|                                |             |                     |                  |                              | Outcome summary                         | Female (total)                               | White > Black and Asian (Indian ) and Asian (Oriental), Asian (Oriental)> Black, Oriental>Indian                                                                 |                                                                                                         |                                        |                            |       |                           |            |
| #Hollo well_2 005 <sup>5</sup> | MCV         | NHAES III           | USA              | Range: 20 -70 years and over | Count                                   | Female<br>Male                               | 3642<br>3147                                                                                                                                                     |                                                                                                         | 2400<br>2961                           | 2166<br>3170               | Good  | Age group weight adjusted |            |
|                                |             |                     |                  |                              | Result: g/dL (mean (SD))                | Female<br>Male                               | 90.6 (4.6)<br>91.0 (4.7)                                                                                                                                         |                                                                                                         | 87.1 (6.45)<br>88.3 (6.12)             | 88.6 (5.5)<br>90.0 (4.4)   |       |                           |            |
|                                |             |                     |                  |                              | Outcome summary                         | Female<br>Male                               | White (Non-Hispanic White)>Other (Mexican American)>Black (Non-Hispanic Black)<br>White (Non-Hispanic White)>Other (Mexican American)>Black (Non-Hispanic Black) |                                                                                                         |                                        |                            |       |                           |            |
| #Horn_ 2002 6                  | MCV         | NHANE S III         | USA              | NR                           | Count                                   | Female<br>Male                               | 1279<br>1032                                                                                                                                                     |                                                                                                         | 842<br>734                             | 909<br>1000                | Poor  |                           |            |
|                                |             |                     |                  |                              | Result: mmol/L (95% reference interval) | Female<br>Male                               | 83.1 - 97.8<br>83.5 - 98                                                                                                                                         |                                                                                                         | 75.1 - 98.5<br>78.1 - 98.4             | 80.7 - 97.0<br>82.3 - 97.1 |       |                           |            |
|                                |             |                     |                  |                              | Outcome summary                         | Female<br>Male                               | White (Non-Hispanic White)>Black (Non-Hispanic Black)<br>White (Non-Hispanic White)>Black (Non-Hispanic Black)                                                   |                                                                                                         |                                        |                            |       |                           |            |

| Study ID                           | Blood tests | Dataset /study name | Country of study | Age (years)    | Stat                                       | Subgroup                                                       | Ethnic distribution                                                                             |                                                                                    |            |           |       | Quality | Covariates |
|------------------------------------|-------------|---------------------|------------------|----------------|--------------------------------------------|----------------------------------------------------------------|-------------------------------------------------------------------------------------------------|------------------------------------------------------------------------------------|------------|-----------|-------|---------|------------|
|                                    |             |                     |                  |                |                                            |                                                                | White                                                                                           | Asian                                                                              | Black      | Other     | Mixed |         |            |
| #Jim_1<br>987 <sup>8</sup>         | MCV         |                     | USA              | 20-40 majority | Count                                      | Female                                                         | 43                                                                                              | 33(Chinese)+72(Filipino)+41(Japanese)                                              |            |           | Poor  |         |            |
|                                    |             |                     |                  |                |                                            | Male                                                           | 70                                                                                              | 78(Chinese)+81(Filipino) + 70 (Japanese)                                           |            |           |       |         |            |
|                                    |             |                     |                  |                | Result: u <sup>3</sup><br>(Median (range)) | Female                                                         | 89 (82- 96)                                                                                     | 88.2 (80.6 - 97.8 Chinese) & 89.4 (81.4 - 97.3 Filipino) & 90.5 (81-98.9 Japanese) |            |           |       |         |            |
|                                    |             |                     |                  |                |                                            | Male                                                           | 89 (81.2 - 100.7)                                                                               | 88 (81 - 95 Chinese) & 90 (81 - 99 Filipino) & 91 (83 - 99 Japanese)               |            |           |       |         |            |
|                                    |             |                     |                  |                | Outcome summary                            | Female<br>Male                                                 | No evidence of difference between White (Caucasian) and Asian ( Chinese, Filipino and Japanese) |                                                                                    |            |           |       |         |            |
| #Johns on-spear_1994 <sup>20</sup> | MCV         | NHANE S II          | USA              | Range: 18-44   | Count                                      | Female                                                         | 2301                                                                                            | 388                                                                                |            |           | Poor  |         |            |
|                                    |             |                     |                  |                |                                            | Result: fL (mean (SD))                                         | Female Iron deficiency                                                                          | 85.1 (5.6)                                                                         | 78.6 (9.3) |           |       |         |            |
|                                    |             |                     |                  |                |                                            | Non- iron deficiency                                           | 90.2 (5.1)                                                                                      | 89.1 (6.6)                                                                         |            |           |       |         |            |
|                                    |             |                     |                  |                | Outcome summary                            | Female (Total )                                                | White>Black                                                                                     |                                                                                    |            |           |       |         |            |
| #Kozliti na_2012 <sup>11</sup>     | MCV         | Dallas Heart Study  | USA              | Range: 18-85   | Count                                      | Total                                                          | 1065                                                                                            | 1633                                                                               |            |           | 459   | Good    |            |
|                                    |             |                     |                  |                |                                            | Result: (% Microcytosis (MCV<80fL) & Macrocytosis (MCV>100fL ) | Female                                                                                          | 3.3 & 3.7                                                                          | 14.3 & 1.4 |           |       |         | 7.8 & 1.1  |
|                                    |             |                     |                  |                |                                            | Male                                                           | 0.6 & 3.3                                                                                       | 6.2 & 1.5                                                                          |            | 1.1 & 1.6 |       |         |            |

| Study ID                  | Blood tests    | Dataset /study name | Country of study | Age (years)                                                  | Stat                   | Subgroup | Ethnic distribution                                                                                                             |             |                              |             |        | Quality | Covariates |
|---------------------------|----------------|---------------------|------------------|--------------------------------------------------------------|------------------------|----------|---------------------------------------------------------------------------------------------------------------------------------|-------------|------------------------------|-------------|--------|---------|------------|
|                           |                |                     |                  |                                                              |                        |          | White                                                                                                                           | Asian       | Black                        | Other       | Mixed  |         |            |
|                           |                |                     |                  |                                                              | Outcome summary        | Total    | Microcytosis was more common in Black (African) and Other (Hispanic) when comparing with White (European American) respectively |             |                              |             |        |         |            |
|                           |                |                     |                  |                                                              |                        |          | Macrocytosis was more common in White (European American) when comparing with Black (African) and Other (Hispanic) respectively |             |                              |             |        |         |            |
| #Pan_2008 <sup>16</sup>   | MCV            | NHANE S III         | USA              | Range: 20--65                                                | Count                  | Male     | 1905                                                                                                                            |             | 1600                         |             |        | Good    |            |
|                           |                |                     |                  |                                                              | Result: fL (mean (SE)) | Male     | 90.2 (0.2)                                                                                                                      |             | 88.1 (0.2)                   |             |        |         |            |
|                           |                |                     |                  |                                                              | Outcome summary        | Male     | White (Non-Hispanic White) >Black(Non-Hispanic Black)                                                                           |             |                              |             |        |         |            |
| #Smit_2019 <sup>17</sup>  | MCV            | NR                  | South Africa     | Range: 18-65                                                 | Count                  | Female   | 286                                                                                                                             |             | 33                           |             | 142    | Fair    |            |
|                           |                |                     |                  |                                                              |                        | Male     | 141                                                                                                                             |             | 32                           |             | 77     |         |            |
|                           |                |                     |                  |                                                              | Result: fL (mean (SD)) | Female   | 89 (6)                                                                                                                          |             | 88 (5)                       |             | 89 (6) |         |            |
|                           |                |                     |                  |                                                              |                        | Male     | 90 (6)                                                                                                                          |             | 87 (8)                       |             | 90 (4) |         |            |
|                           |                |                     |                  |                                                              | Outcome summary        | Female   | No evidence of difference between White (Caucasian), Black (African) and Mixed group                                            |             |                              |             |        |         |            |
|                           |                |                     |                  |                                                              |                        | Male     | White (Caucasian)> Black (African), Mixed > Black(African)                                                                      |             |                              |             |        |         |            |
| Yassin_2022 <sup>19</sup> | MCV            | NR                  | Qatar            | Range: 18-60                                                 | Count                  | Female   |                                                                                                                                 | 130         | 95                           | 225         |        | Poor    |            |
|                           |                |                     |                  |                                                              |                        | Male     |                                                                                                                                 | 355         | 160                          | 515         |        |         |            |
|                           |                |                     |                  |                                                              | Result: fL (mean (SD)) | Female   |                                                                                                                                 | 83.5 (10.2) | 82.9 (13.81)                 | 83.4 (11.0) |        |         |            |
|                           |                |                     |                  |                                                              |                        | Male     |                                                                                                                                 | 83.9 (7.6)  | 83.6 (5.6)                   | 83.8 (6.9)  |        |         |            |
|                           |                |                     |                  |                                                              | Outcome summary        | Female   | No evidence of difference in Asian, Black (African) and Other (Arab)                                                            |             |                              |             |        |         |            |
|                           |                |                     |                  |                                                              |                        | Male     | No evidence of difference in Asian, Black (African) and Other (Arab)                                                            |             |                              |             |        |         |            |
| #Bain_1986 <sup>21</sup>  | Platelet count | NR                  | UK               | Median: White 25, Black (African) 29, Black (West Indian) 26 | Count                  | Female   | 217                                                                                                                             |             | 63(West Indian)+13 (African) |             |        | poor    |            |
|                           |                |                     |                  |                                                              |                        | Male     | 148                                                                                                                             |             | 10(West Indian)+12 (African) |             |        |         |            |



| Study ID                         | Blood tests    | Dataset /study name | Country of study | Age (years)                                  | Stat                                                        | Subgroup | Ethnic distribution                                                         |              |                                                       |                 |       | Quality | Covariates |
|----------------------------------|----------------|---------------------|------------------|----------------------------------------------|-------------------------------------------------------------|----------|-----------------------------------------------------------------------------|--------------|-------------------------------------------------------|-----------------|-------|---------|------------|
|                                  |                |                     |                  |                                              |                                                             |          | White                                                                       | Asian        | Black                                                 | Other           | Mixed |         |            |
|                                  |                |                     |                  |                                              | Result: x10 <sup>9</sup> /l (mean (95% reference interval)) | Female   | 289 (187 - 445)                                                             |              | 250 (166 – 377 African & 257 (160 - 411 West Indian)  |                 |       |         |            |
|                                  |                |                     |                  |                                              |                                                             | Male     | 262 (168 - 411)                                                             |              | 216 (128 - 365 African) & 271 (210 - 351 West Indian) |                 |       |         |            |
|                                  |                |                     |                  |                                              | Outcome summary                                             | Female   | White (Caucasian)>Black (West Indian) & Black (African);                    |              |                                                       |                 |       |         |            |
|                                  |                |                     |                  |                                              |                                                             | Male     | White (Caucasian)> Black (African), West Indian>African                     |              |                                                       |                 |       |         |            |
| <b>#Bain_1996</b> <sup>22</sup>  | Platelet count | NR                  | UK               | Range: 18-55                                 | Count                                                       | Female   | 100                                                                         |              | 50                                                    | 51              |       | poor    |            |
|                                  |                |                     |                  |                                              |                                                             | Male     | 100                                                                         |              | 65                                                    | 51              |       |         |            |
|                                  |                |                     |                  |                                              | Result: x10 <sup>9</sup> /l (geometric mean (95% range))    | Female   | 246 (169 - 358)                                                             |              | 207 (125 - 342)                                       | 236 (149 - 374) |       |         |            |
|                                  |                |                     |                  |                                              |                                                             | Male     | 218 (143 - 322)                                                             |              | 183 (115 - 290)                                       | 196 (122 - 313) |       |         |            |
|                                  |                |                     |                  |                                              | Outcome summary                                             | Female   | White (Caucasian)> Black (African), Other (Afrocaribbean)> Black (African)  |              |                                                       |                 |       |         |            |
|                                  |                |                     |                  |                                              |                                                             | Male     | White (Caucasian)> Black (African), White (Caucasian)>Other (Afrocaribbean) |              |                                                       |                 |       |         |            |
| <b>#Cheng_2004</b> <sup>3</sup>  | Platelet count | NHANE S III         | USA              | Range: 18 - 75                               | Count                                                       | Female   | 1937                                                                        |              | 1048                                                  | 1185            |       | Poor    |            |
|                                  |                |                     |                  |                                              |                                                             | Male     | 1188                                                                        |              | 564                                                   | 550             |       |         |            |
|                                  |                |                     |                  |                                              | Result                                                      | Female   | No numerical result was reported                                            |              |                                                       |                 |       |         |            |
|                                  |                |                     |                  |                                              |                                                             | Male     |                                                                             |              |                                                       |                 |       |         |            |
|                                  |                |                     |                  |                                              | Outcome summary                                             | Female   | No evidence of difference was reported between White (Non-Hispanic White);  |              |                                                       |                 |       |         |            |
|                                  |                |                     |                  |                                              |                                                             | Male     | Black (Non-Hispanic black) and Other (Mexican American)                     |              |                                                       |                 |       |         |            |
| <b>#Gader_1995</b> <sup>23</sup> | Platelet count | NR                  | Saudi Arabia     | Mean (SD) White: 34.7(8.6) Asian: 30.4 (6.3) | Count                                                       | Male     | 237                                                                         | 247          | 75                                                    | 487             |       | Poor    |            |
|                                  |                |                     |                  |                                              | Result: x10 <sup>9</sup> /l ( mean (SD))                    | Male     | 248.7 (76.8)                                                                | 247.3 (66.4) | 238.5 (60.4)                                          | 256.8 (71.5)    |       |         |            |

| Study ID                     | Blood tests    | Dataset /study name | Country of study | Age (years)                             | Stat                                                  | Subgroup | Ethnic distribution                                                                                                                                                     |              |              |              |       | Quality | Covariates                |
|------------------------------|----------------|---------------------|------------------|-----------------------------------------|-------------------------------------------------------|----------|-------------------------------------------------------------------------------------------------------------------------------------------------------------------------|--------------|--------------|--------------|-------|---------|---------------------------|
|                              |                |                     |                  |                                         |                                                       |          | White                                                                                                                                                                   | Asian        | Black        | Other        | Mixed |         |                           |
|                              |                |                     |                  | Black: 26.8 (5.5)<br>Other: 24.9 (10.8) | Outcome summary                                       | Male     | Other (Saudi) > Black (West African);<br>No evidence of difference was reported between Asian (Southeast Asians, Koreans and Filipinos), White (Europeans and American) |              |              |              |       |         |                           |
| #Hollowell 2005 <sup>5</sup> | Platelet count | NHAES III           | USA              | Range: 20 -70 years and over            | Count                                                 | Female   | 3641                                                                                                                                                                    |              | 2400         | 2166         |       | Good    | Age group weight adjusted |
|                              |                |                     |                  |                                         |                                                       | Male     | 3145                                                                                                                                                                    |              | 2961         | 3170         |       |         |                           |
|                              |                |                     |                  |                                         | Result: x10 <sup>9</sup> /l (mean (SD))               | Female   | 277.1 (70.7)                                                                                                                                                            |              | 1294.5(76.0) | 292.7 (72.8) |       |         |                           |
|                              |                |                     |                  |                                         |                                                       | Male     | 252.7 (67.3)                                                                                                                                                            |              | 261.8 (69.7) | 261.6 (64.3) |       |         |                           |
|                              |                |                     |                  |                                         | Outcome summary                                       | Female   | Black (Non-Hispanic Black)>White (Non-Hispanic White), Other (Mexican American)>White (Non-Hispanic White)                                                              |              |              |              |       |         |                           |
|                              |                |                     |                  |                                         |                                                       | Male     | Black (Non-Hispanic Black)>White (Non-Hispanic White), Other (Mexican American)>White (Non-Hispanic White)                                                              |              |              |              |       |         |                           |
| #Horn_2002 <sup>6</sup>      | Platelet count | NHANE S III         | USA              | NR                                      | Count                                                 | Female   | 1279                                                                                                                                                                    |              | 842          | 909          |       | Poor    |                           |
|                              |                |                     |                  |                                         |                                                       | Male     | 1032                                                                                                                                                                    |              | 734          | 1000         |       |         |                           |
|                              |                |                     |                  |                                         | Result: x10 <sup>9</sup> /l (95% reference interval)  | Female   | 172-398                                                                                                                                                                 |              | 181 -1433    | 175 - 431    |       |         |                           |
|                              |                |                     |                  |                                         |                                                       | Male     |                                                                                                                                                                         |              |              |              |       |         |                           |
|                              |                |                     |                  |                                         | Outcome summary                                       | Female   | No evidence of difference was reported between White (Non-Hispanic White), Black (Non-Hispanic black) and Other (Mexican American)                                      |              |              |              |       |         |                           |
|                              |                |                     |                  |                                         |                                                       | Male     |                                                                                                                                                                         |              |              |              |       |         |                           |
| #Miller_1988 <sup>15</sup>   | Platelet count | NR                  | UK               | Range: 45-54                            | Count                                                 | Male     | 68                                                                                                                                                                      | 75           | 24           |              |       | Fair    |                           |
|                              |                |                     |                  |                                         | Result: x10 <sup>3</sup> /mm <sup>3</sup> (mean (SD)) | Male     | 218.3 (63)                                                                                                                                                              | 252.0 (86.4) | 217.1 (57.1) |              |       |         |                           |
|                              |                |                     |                  |                                         | Outcome summary                                       | Male     | Asian (Indian)>White (European); No evidence of difference in comparisons with Black (West Indian)                                                                      |              |              |              |       |         |                           |
|                              |                |                     |                  |                                         |                                                       |          |                                                                                                                                                                         |              |              |              |       |         |                           |
| #Pan_2008 <sup>16</sup>      | Platelet count | NHANE S III         | USA              | Range: 20--65                           | Count                                                 | Male     | 1905                                                                                                                                                                    |              | 1600         |              |       | Good    |                           |
|                              |                |                     |                  |                                         | Result: x10 <sup>3</sup> /mm <sup>3</sup> (mean (SE)) | Male     | 258.2 (2.8)                                                                                                                                                             |              | 263.3 (2.4)  |              |       |         |                           |
|                              |                |                     |                  |                                         | Outcome summary                                       | Male     | Black (Non-Hispanic Black)>White (Non-Hispanic White)                                                                                                                   |              |              |              |       |         |                           |
|                              |                |                     |                  |                                         |                                                       |          |                                                                                                                                                                         |              |              |              |       |         |                           |

| Study ID                   | Blood tests     | Dataset /study name | Country of study                                                                     | Age (years)  | Stat         | Subgroup                                                                                                    | Ethnic distribution                                                                |                                                                                                             |                 |                 |                 | Quality                                                                                            | Covariates |
|----------------------------|-----------------|---------------------|--------------------------------------------------------------------------------------|--------------|--------------|-------------------------------------------------------------------------------------------------------------|------------------------------------------------------------------------------------|-------------------------------------------------------------------------------------------------------------|-----------------|-----------------|-----------------|----------------------------------------------------------------------------------------------------|------------|
|                            |                 |                     |                                                                                      |              |              |                                                                                                             | White                                                                              | Asian                                                                                                       | Black           | Other           | Mixed           |                                                                                                    |            |
| #Segal_2006 <sup>24</sup>  | Platelet Count  | NHANES III          | USA                                                                                  | Above 17     | Count        | Total                                                                                                       | 4978                                                                               |                                                                                                             | 3278            | 3400            | Good            | Evidence remained the same when adjusted (nutritional and inflammatory covariates and alcohol use) |            |
|                            |                 |                     |                                                                                      |              |              |                                                                                                             | Result: $\times 10^3/\mu\text{l}$ (median (range) of geometric mean in age groups) | Female                                                                                                      | 275 (254 - 284) | 287 (265 - 300) | 285 (268 - 295) |                                                                                                    |            |
|                            |                 |                     |                                                                                      |              |              |                                                                                                             |                                                                                    | Male                                                                                                        | 251 (232 - 260) | 262 (242 - 271) | 261 (241 - 270) |                                                                                                    |            |
|                            |                 |                     |                                                                                      |              |              | Outcome summary                                                                                             | Female                                                                             | Black (Non-Hispanic black) >White (Non-Hispanic White), Other (Mexican American)>White (Non-Hispanic White) |                 |                 |                 |                                                                                                    |            |
|                            |                 |                     |                                                                                      |              | Male         | Black (Non-Hispanic black) >White (Non-Hispanic White), Other (Mexican American)>White (Non-Hispanic White) |                                                                                    |                                                                                                             |                 |                 |                 |                                                                                                    |            |
| #Sigola_1994 <sup>25</sup> | Platelet count  | NR                  | Zimbabwe                                                                             | Range: 20-50 | Count        | Male                                                                                                        | 29                                                                                 |                                                                                                             | 56              | Fair            |                 |                                                                                                    |            |
|                            |                 |                     |                                                                                      |              |              |                                                                                                             | Result: $\times 10^9/\text{l}$ (mean (SE))                                         | Male                                                                                                        | 263 (11)        | 258 (8)         |                 |                                                                                                    |            |
|                            |                 |                     |                                                                                      |              |              | Outcome summary                                                                                             | Male                                                                               | No evidence of difference was reported                                                                      |                 |                 |                 |                                                                                                    |            |
| #Smit_2019 <sup>17</sup>   | Platelet count  | NR                  | South Africa                                                                         | Range: 18-65 | Count        | Female                                                                                                      | 286                                                                                |                                                                                                             | 33              | 142             | Fair            |                                                                                                    |            |
|                            |                 |                     |                                                                                      |              |              | Male                                                                                                        | 141                                                                                |                                                                                                             | 32              | 77              |                 |                                                                                                    |            |
|                            |                 |                     |                                                                                      |              |              |                                                                                                             | Result: $\times 10^9/\text{l}$ (mean (SD))                                         | Female                                                                                                      | 267.2 (65.9)    | 261.2 (53.2)    |                 | 270.7 (66.2)                                                                                       |            |
|                            |                 |                     |                                                                                      |              |              |                                                                                                             |                                                                                    | Male                                                                                                        | 284.4 (68.8)    | 263.6 (71.5)    |                 | 273.0 (64.7)                                                                                       |            |
|                            | Outcome summary | Female<br>Male      | No evidence of difference between White (Caucasian), Black (African) and Mixed group |              |              |                                                                                                             |                                                                                    |                                                                                                             |                 |                 |                 |                                                                                                    |            |
| #Yassin_2022 <sup>19</sup> | Platelet count  | NR                  | Qatar                                                                                | Range: 18-60 | Count        | Female                                                                                                      |                                                                                    | 130                                                                                                         | 95              | 225             | Poor            |                                                                                                    |            |
|                            |                 |                     |                                                                                      |              |              | Male                                                                                                        |                                                                                    | 355                                                                                                         | 160             | 515             |                 |                                                                                                    |            |
|                            |                 |                     |                                                                                      |              |              |                                                                                                             | Result: $\times 10^9/\text{l}$ (mean (SD))                                         | Female                                                                                                      | 265.0 (61.8)    | 243.1 (43.8)    |                 | 260.9 (59.5)                                                                                       |            |
|                            |                 | Male                | 252.4 (65.7)                                                                         | 247.7 (63.3) | 250.7 (65.2) |                                                                                                             |                                                                                    |                                                                                                             |                 |                 |                 |                                                                                                    |            |

| Study ID                                     | Blood tests | Dataset /study name  | Country of study | Age (years)            | Stat                                      | Subgroup                          | Ethnic distribution                                                                                                    |                                          |                                  |                                    |       | Quality | Covariates                                                     |
|----------------------------------------------|-------------|----------------------|------------------|------------------------|-------------------------------------------|-----------------------------------|------------------------------------------------------------------------------------------------------------------------|------------------------------------------|----------------------------------|------------------------------------|-------|---------|----------------------------------------------------------------|
|                                              |             |                      |                  |                        |                                           |                                   | White                                                                                                                  | Asian                                    | Black                            | Other                              | Mixed |         |                                                                |
|                                              |             |                      |                  |                        | Outcome summary                           | Female<br>Male                    | No evidence of difference between Asian, Black (African) and Other (Arab)                                              |                                          |                                  |                                    |       |         |                                                                |
| <b>¶Akinyemiju_2019</b><br><small>26</small> | CRP         | REGARD               | USA              | > 45                   | Count                                     | Gender not specified (55% Female) | 928                                                                                                                    |                                          | 928                              |                                    |       | Poor    |                                                                |
|                                              |             |                      |                  |                        | Result: % in Tertiles of sample CRP value | Gender not specified (55% Female) |                                                                                                                        |                                          |                                  | Tertile 1: 32.8<br>Tertile 3: 50.9 |       |         |                                                                |
|                                              |             |                      |                  |                        | Outcome summary                           | Gender not specified (55% Female) | Black (Non-Hispanic black) > White (Non-Hispanic white)                                                                |                                          |                                  |                                    |       |         |                                                                |
| <b>~Alber t_2004</b><br><small>27</small>    | CRP         | Women's Health Study | USA              | Mean (SD): 54 (7.1)    | Count                                     | Female                            | 24455                                                                                                                  | 357                                      | 475                              | 254                                |       | Good    | Evidence remained the same when applying fully adjusted model* |
|                                              |             |                      |                  |                        | Result: mg/L (Median (IQR))               | Female                            | 2.01 (0.81 – 4.37)                                                                                                     | 1.12 (0.48-2.25)                         | 2.96 (1.19 - 5.86)               | 2.06 (0.88 - 4.88)                 |       |         |                                                                |
|                                              |             |                      |                  |                        | Outcome summary                           | Female                            | Black> White> Asian (Asian/Pacific Islander)                                                                           |                                          |                                  |                                    |       |         |                                                                |
| <b>#Anand_2004</b><br><small>28</small>      | CRP         | SHARE                | Canada           | Mean (SD): 50.4 (10.3) | Count                                     | Gender not specified (51% Female) | 332                                                                                                                    | 306 (Chinese)+ 323 (South Asian)         |                                  | 299                                |       | Good    | Adjusted for age and sex                                       |
|                                              |             |                      |                  |                        | Result: mg/L (mean (SE))                  | Gender not specified (51% Female) | 2.1 (0.1)                                                                                                              | 1.2(0.1 Chinese) & 2.6 (0.1 South Asian) |                                  | 3.7 (0.1)                          |       |         |                                                                |
|                                              |             |                      |                  |                        | Outcome summary                           | Gender not specified (51% Female) | Other (Aboriginal)>Asian (South Asian) and White (European) and Asian (Chinese), South Asian>White (European)& Chinese |                                          |                                  |                                    |       |         |                                                                |
| <b>#Beasley_2009</b><br><small>29</small>    | CRP         | Health ABC           | USA              | Range:70-79            | Count                                     | Female<br>Male                    | 757<br>831                                                                                                             |                                          | 592<br>471                       |                                    |       | poor    |                                                                |
|                                              |             |                      |                  |                        | Result: pg/mL (median (IQR))              | Female<br>Male                    | 1.6 (1-3.1)<br>1.3 (0.9 - 2.3)                                                                                         |                                          | 2.2 (1.1 - 4)<br>1.8 (1.1 - 3.3) |                                    |       |         |                                                                |

| Study ID                      | Blood tests | Dataset /study name                      | Country of study | Age (years)                                | Stat                          | Subgroup             | Ethnic distribution                                                                                                            |                    |                    |                    |       | Quality                  | Covariates                                                                                     |
|-------------------------------|-------------|------------------------------------------|------------------|--------------------------------------------|-------------------------------|----------------------|--------------------------------------------------------------------------------------------------------------------------------|--------------------|--------------------|--------------------|-------|--------------------------|------------------------------------------------------------------------------------------------|
|                               |             |                                          |                  |                                            |                               |                      | White                                                                                                                          | Asian              | Black              | Other              | Mixed |                          |                                                                                                |
| #Chandalia_2003 <sup>30</sup> | CRP         | NA                                       | USA              | Mean (SD):<br>Asian 31 (2)<br>White 29 (7) | Outcome summary               | Female<br>Male       | Black>White,<br>Black >White                                                                                                   |                    |                    |                    |       | Poor                     | Evidence remained the same adjusted for total fat mass, WC, insulin area under curve, estimate |
|                               |             |                                          |                  |                                            | Count                         | Male                 | 82                                                                                                                             | 55                 |                    |                    |       |                          |                                                                                                |
|                               |             |                                          |                  |                                            | Result: mg/L (Geometric mean) | Male                 | 0.63                                                                                                                           | 0.94               |                    |                    |       |                          |                                                                                                |
|                               |             |                                          |                  |                                            | Outcome summary               | Male                 | Asian (Asian Indian)><br>White (Caucasian)                                                                                     |                    |                    |                    |       |                          |                                                                                                |
| ~Conroy_2011 <sup>31</sup>    | CRP         | a nutritional intervention study         | USA              | Range: 35-47                               | Count                         | Female               | 67                                                                                                                             | 74                 |                    | 23                 | Good  | Premenopausal            |                                                                                                |
|                               |             |                                          |                  |                                            | Result: mg/L (mean (SD))      | Female               | 1.7 (3.3)                                                                                                                      | 0.6 (1.5)          |                    | 1.1 (1.5)          |       |                          |                                                                                                |
|                               |             |                                          |                  |                                            | Outcome summary               | Female               | White (Caucasian)>Asian (Japanese/Chinese/Filipino), no evidence of difference when comparing with Other (Native Hawaiian/Mix) |                    |                    |                    |       |                          |                                                                                                |
| #Fair_2007 <sup>32</sup>      | CRP         | Kaiser Permanente of Northern California | USA              | Range: 60-69                               | Count                         | Female<br>Male       | 280<br>443                                                                                                                     | 26<br>41           | 34<br>71           | 29<br>44           | poor  |                          |                                                                                                |
|                               |             |                                          |                  |                                            | Result: mg/L (mean (SD))      | Female<br>Male       | 4.3 (7)<br>2.6 (6)                                                                                                             | 2.5 (4)<br>2.5 (8) | 6.1 (8)<br>3.2 (5) | 4.9 (6)<br>2.2 (2) |       |                          |                                                                                                |
|                               |             |                                          |                  |                                            | Outcome summary               | Female<br>Male       | No evidence of difference in comparison with White, Asian (east Asian), Black (African-American) and Other (Hispanic)          |                    |                    |                    |       |                          |                                                                                                |
|                               |             |                                          |                  |                                            |                               |                      |                                                                                                                                |                    |                    |                    |       |                          |                                                                                                |
| #Ford_2002 <sup>33</sup>      | CRP         | NHAHE S III                              | USA              | ≥20                                        | Count                         | Gender not specified | NR                                                                                                                             |                    | NR                 | NR                 | Good  | Fully adjusted model for |                                                                                                |

| Study ID                   | Blood tests | Dataset /study name | Country of study | Age (years)                                                                                                         | Stat                          | Subgroup             | Ethnic distribution                                                             |       |                    |                                                               |       | Quality                                                                                 | Covariates |
|----------------------------|-------------|---------------------|------------------|---------------------------------------------------------------------------------------------------------------------|-------------------------------|----------------------|---------------------------------------------------------------------------------|-------|--------------------|---------------------------------------------------------------|-------|-----------------------------------------------------------------------------------------|------------|
|                            |             |                     |                  |                                                                                                                     |                               |                      | White                                                                           | Asian | Black              | Other                                                         | Mixed |                                                                                         |            |
|                            |             |                     |                  |                                                                                                                     | Result: (OR (95%CI))          | Gender not specified | Reference                                                                       |       | 1.55 (1.31 - 1.83) | 1.3 (1.06 - 1.59 Mexican American) & 1.04 (0.78 - 1.37 Other) |       | testing association for CRP and leisure-time physical activity **                       |            |
|                            |             |                     |                  |                                                                                                                     | Outcome summary               | Gender not specified | Black (African-American) and Other (Mexican-American)>White                     |       |                    |                                                               |       |                                                                                         |            |
| #Ford_2004 <sup>34</sup>   | CRP         | NHANE S 1999-2000   | USA              | ≥20                                                                                                                 | Count                         | Female               | 963                                                                             |       | 419                | 618 (Mexican-American)+183 (Other)                            | Good  | Adjusted for age;                                                                       |            |
|                            |             |                     |                  |                                                                                                                     | Result: mg/L (Geometric mean) | Female               | 2.3                                                                             |       | 3.1                | 3.5                                                           |       | No evidence of difference between White and Black when applying fully adjusted model*** |            |
|                            |             |                     |                  |                                                                                                                     | Outcome summary               | Female               | Black (African American)>White, Other (Mexican American)>White                  |       |                    |                                                               |       |                                                                                         |            |
| #Hanley_2007 <sup>35</sup> | CRP         | IRAS Family Study   | USA              | Mean (SD)<br>Female: Black 40.44(12.96),<br>Other 41.61 (13.49),<br>Male: Black 42.37(14.25),<br>Other 40.01(14.42) | Count                         | Female<br>Male       |                                                                                 |       | 299<br>233         | 662<br>452                                                    | Good  |                                                                                         |            |
|                            |             |                     |                  |                                                                                                                     | Result: mg/L (median (IQR))   | Female<br>Male       |                                                                                 |       | 2.6 (0.9 - 6.0)    | 2.2 (0.9 - 5.1)                                               |       |                                                                                         |            |
|                            |             |                     |                  |                                                                                                                     | Outcome summary               | Female<br>Male       | No evidence of difference between Black( African-American) and Other (Hispanic) |       |                    |                                                               |       |                                                                                         |            |
| #Khera_2005 <sup>36</sup>  | CRP         | Dallas Heart Study  | USA              | Range:30-65                                                                                                         | Count                         | Female<br>Male       | 516<br>475                                                                      |       | 1018<br>740        |                                                               | Poor  |                                                                                         |            |
|                            |             |                     |                  |                                                                                                                     | Result: mg/L (median)         | Female<br>Male       | 3.2<br>1.7                                                                      |       | 3.5<br>2.1         |                                                               |       |                                                                                         |            |
|                            |             |                     |                  |                                                                                                                     | Outcome summary               | Total                | Black>White                                                                     |       |                    |                                                               |       |                                                                                         |            |

| Study ID                     | Blood tests | Dataset /study name  | Country of study | Age (years)   | Stat                                             | Subgroup                                | Ethnic distribution                                                                                                |                                           |                        |               |       | Quality | Covariates                                                                               |
|------------------------------|-------------|----------------------|------------------|---------------|--------------------------------------------------|-----------------------------------------|--------------------------------------------------------------------------------------------------------------------|-------------------------------------------|------------------------|---------------|-------|---------|------------------------------------------------------------------------------------------|
|                              |             |                      |                  |               |                                                  |                                         | White                                                                                                              | Asian                                     | Black                  | Other         | Mixed |         |                                                                                          |
| #Lin_2007 <sup>37</sup>      | CRP         | NHANES 1999-2002     | USA              | ≥40           | Count                                            | Gender not specified (total)            | 3526                                                                                                               |                                           | 1252                   | 1422          |       | Poor    |                                                                                          |
|                              |             |                      |                  |               | Result: (% of people with elevated CRP ≥10 mg/L) | Gender not specified (without diabetes) | 9.7                                                                                                                |                                           | 17.4                   | 11.4          |       |         |                                                                                          |
|                              |             |                      |                  |               | Outcome summary                                  | Gender not specified (without diabetes) | Black >White, No evidence of difference in comparison with Other (Mexican American)                                |                                           |                        |               |       |         |                                                                                          |
| #Matthews_2005 <sup>38</sup> | CRP         | SWAN                 | USA              | Range: 42-52  | Count                                            | Female                                  | 1400                                                                                                               | 231 (Chinese) + 248 (Japanese)            | 729                    | 226           |       | Fair    | No evidence of difference between White and Asian When applying fully adjusted model**** |
|                              |             |                      |                  |               | Result: mg/L (median (IQR))                      | Female                                  | 1.4 (0.6- 3.9)                                                                                                     | 0.7 (0.3 - 1.4 Chinese) & 0.5 (0.2 - 1.2) | 3 (1 -7.2)             | 2.3 (1 - 5.1) |       |         |                                                                                          |
|                              |             |                      |                  |               | Outcome summary                                  | Female                                  | Black (African-American)> White >Asian (Chinese and Japanese) and, Other (Hispanic) > Asian (Chinese and Japanese) |                                           |                        |               |       |         |                                                                                          |
| #Nguyen_2010 <sup>39</sup>   | CRP         | Bogalusa Heart Study | USA              | Mean 36.3     | Count                                            | Female<br>Male                          | 454<br>374                                                                                                         |                                           | 221<br>135             |               | Fair  |         |                                                                                          |
|                              |             |                      |                  |               | Result: mg/L (mean (SE))                         | Female<br>Male                          | 3.3 (0.2)<br>2 (0.1)                                                                                               |                                           | 4.1 (0.3)<br>2.6 (0.3) |               |       |         |                                                                                          |
|                              |             |                      |                  |               | Outcome summary                                  | Female<br>Male                          | No evidence of difference between White and Black                                                                  |                                           |                        |               |       |         |                                                                                          |
| #Pan_2008 <sup>16</sup>      | CRP         | NHANES III           | USA              | Range: 20--65 | Count                                            | Male                                    | 1905                                                                                                               |                                           | 1600                   |               | Good  |         |                                                                                          |
|                              |             |                      |                  |               | Result: mg/dL (mean (SE))                        | Male                                    | 0.3 (<0.1)                                                                                                         |                                           | 0.4 (<0.1)             |               |       |         |                                                                                          |
|                              |             |                      |                  |               | Outcome summary                                  | Male                                    | Black (Non-Hispanic Black)>White (Non- Hispanic White)                                                             |                                           |                        |               |       |         |                                                                                          |

| Study ID                     | Blood tests | Dataset /study name   | Country of study | Age (years)            | Stat                                                              | Subgroup       | Ethnic distribution                                                                                                              |                                                 |                                           |                                  |       | Quality | Covariates |
|------------------------------|-------------|-----------------------|------------------|------------------------|-------------------------------------------------------------------|----------------|----------------------------------------------------------------------------------------------------------------------------------|-------------------------------------------------|-------------------------------------------|----------------------------------|-------|---------|------------|
|                              |             |                       |                  |                        |                                                                   |                | White                                                                                                                            | Asian                                           | Black                                     | Other                            | Mixed |         |            |
| #Wener_2000 <sup>40</sup>    | CRP         | NHANES III            | USA              | Range: 20-70 and above | Count                                                             | Female<br>Male | NR                                                                                                                               |                                                 | NR                                        | NR                               |       | Good    |            |
|                              |             |                       |                  |                        | Result: mg/L (median (range) of CRP 95% percentile in age groups) | Female<br>Male | 1.37 (1.04 - 1.68)                                                                                                               |                                                 | 2.19 (1.6 - 2.56)                         | 1.73 (1.44 - 2.47)               |       |         |            |
|                              |             |                       |                  |                        |                                                                   |                | 0.9 (0.51 - 1.24)                                                                                                                |                                                 | 1.82 (0.73 - 2.4)                         | 1.29 (0.66 - 2.59)               |       |         |            |
|                              |             |                       |                  |                        | Outcome summary                                                   | Female<br>Male | No evidence of difference in comparison with White (Non-Hispanic white); Black (Non-Hispanic black) and Other (Mexican American) |                                                 |                                           |                                  |       |         |            |
| #Birk_2018 <sup>41</sup>     | Albumin     | Soroka medical Centre | Israel           | Range: 18-52           | Count                                                             | Male           | 118                                                                                                                              |                                                 |                                           | 108 (Ashkenazi)+ 255 (Sephardic) | Good  |         |            |
|                              |             |                       |                  |                        | Result: g/L (mean (SD))                                           | Male           | 40 (0.6)                                                                                                                         |                                                 | 39.4 (0.4 Sephardic) & 37.8 (0.4 Bedouin) |                                  |       |         |            |
|                              |             |                       |                  |                        | Outcome summary                                                   | Male           | White (Ashkenazi)>Other (Sephardic)>Other (Bedouin)                                                                              |                                                 |                                           |                                  |       |         |            |
|                              |             |                       |                  |                        |                                                                   |                |                                                                                                                                  |                                                 |                                           |                                  |       |         |            |
| #Godsl and_1983 <sup>4</sup> | Albumin     | NR                    | UK               | Range: 16-45           | Count                                                             | Female         | 71                                                                                                                               | 37 (Oriental)+ 71 (Indian)                      | 109                                       |                                  | Good  |         |            |
|                              |             |                       |                  |                        | Result: g/L (median (range))                                      | Female         | 42.5 (36 - 52)                                                                                                                   | 41.9 (38 - 46 Oriental) & 41.2 (34 - 48 Indian) | 41.2 (35 - 49)                            |                                  |       |         |            |
|                              |             |                       |                  |                        | Outcome summary                                                   | Female         | White > Black, White > Asian (Indian)                                                                                            |                                                 |                                           |                                  |       |         |            |
|                              |             |                       |                  |                        |                                                                   |                |                                                                                                                                  |                                                 |                                           |                                  |       |         |            |
| #Horn_2002 <sup>6</sup>      | Albumin     | NHANES III            | USA              | NR                     | Count                                                             | Female<br>Male | 1279<br>1032                                                                                                                     |                                                 | 842<br>734                                | 909<br>1000                      | Poor  |         |            |
|                              |             |                       |                  |                        | Result: g/dL (95% reference interval)                             | Female<br>Male | 35 - 47<br>37 - 50                                                                                                               |                                                 | 32 - 47<br>36 - 49                        | 34 - 48<br>38 - 50               |       |         |            |
|                              |             |                       |                  |                        | Outcome summary                                                   | Female<br>Male | No evidence of difference in comparison with White (Non-Hispanic White), Black (Non-Hispanic Black) and Other (Mexican American) |                                                 |                                           |                                  |       |         |            |
|                              |             |                       |                  |                        |                                                                   |                |                                                                                                                                  |                                                 |                                           |                                  |       |         |            |
| #Johnson_2004 <sup>20</sup>  | Albumin     | NR                    | UK               | Range: 21-62           | Count                                                             | Male           | 141                                                                                                                              | 43                                              |                                           |                                  | Fair  |         |            |



| Study ID                                  | Blood tests | Dataset /study name | Country of study | Age (years)   | Stat                                       | Subgroup                    | Ethnic distribution                                                |             |                              |       |       | Quality | Covariates |
|-------------------------------------------|-------------|---------------------|------------------|---------------|--------------------------------------------|-----------------------------|--------------------------------------------------------------------|-------------|------------------------------|-------|-------|---------|------------|
|                                           |             |                     |                  |               |                                            |                             | White                                                              | Asian       | Black                        | Other | Mixed |         |            |
|                                           |             |                     |                  |               | Result: g/dL (lower limit and upper limit) | Male                        | 40.1 - 49.4                                                        | 38.3 - 49.4 |                              |       |       |         |            |
|                                           |             |                     |                  |               | Outcome summary                            | Male                        | White (Caucasian> Asian (Indian)                                   |             |                              |       |       |         |            |
| <b>#Kerr_1982</b><br><small>10</small>    | Albumin     | HANES I             | USA              | Range: 18-44  | Count                                      | 18-44 yr:<br>Female<br>Male | 3773<br>1838                                                       |             | 931<br>330                   |       |       | Poor    |            |
|                                           |             |                     |                  |               |                                            | 45-75yr total               | 5116                                                               |             | 1008                         |       |       |         |            |
|                                           |             |                     |                  |               | Result: (% (SE) below standard (35g/L))    | 18-44 yr:<br>Female<br>Male | 0.4 (0.1)<br>0.1 (0.1)                                             |             | 1.1 (0.6)<br>0.1 (1.1)       |       |       |         |            |
|                                           |             |                     |                  |               |                                            | 45-75yr total               | 1.0 (0.01)                                                         |             | 2.1 (0.03)                   |       |       |         |            |
|                                           |             |                     |                  |               | Outcome summary                            | 18-44 yr:<br>Female<br>Male | White (Hispanic included)>Black<br>White (Hispanic included)>Black |             |                              |       |       |         |            |
|                                           |             |                     |                  |               |                                            | 45-75yr total               | White (Hispanic included)>Black                                    |             |                              |       |       |         |            |
| <b>#Manolio_1992</b><br><small>42</small> | Albumin     | CARDIA              | USA              | Range: 18-30  | Count                                      | Female<br>Male              | 1299<br>1161                                                       |             | 1447<br>1143                 |       |       | Fair    |            |
|                                           |             |                     |                  |               | Result: g/L (Median (5%-95%percentile))    | Female<br>Male              | 47 (41 - 50)<br>48 (44 - 52)                                       |             | 45 (40 - 52)<br>47 (42 - 49) |       |       |         |            |
|                                           |             |                     |                  |               | Outcome summary                            | Female<br>Male              | White>Black                                                        |             |                              |       |       |         |            |
| <b>#Pan_2008</b><br><small>16</small>     | Albumin     | NHANE S III         | USA              | Range: 20--65 | Count                                      | Male                        | 1905                                                               |             | 1600                         |       |       | Good    |            |
|                                           |             |                     |                  |               | Result: mg/dL (mean (SE))                  | Male                        | 4.4 (<0.1)                                                         |             | 4.1 (<0.1)                   |       |       |         |            |
|                                           |             |                     |                  |               | Outcome summary                            | Male                        | White (Non- Hispanic White) >Black (Non-Hispanic Black)            |             |                              |       |       |         |            |

| Study ID                     | Blood tests | Dataset /study name   | Country of study | Age (years)                                                  | Stat                       | Subgroup             | Ethnic distribution                                                         |             |                                            |                                |       | Quality | Covariates |  |
|------------------------------|-------------|-----------------------|------------------|--------------------------------------------------------------|----------------------------|----------------------|-----------------------------------------------------------------------------|-------------|--------------------------------------------|--------------------------------|-------|---------|------------|--|
|                              |             |                       |                  |                                                              |                            |                      | White                                                                       | Asian       | Black                                      | Other                          | Mixed |         |            |  |
| #Perry_1993 <sup>43</sup>    | Albumin,    | SHEP and CHIPS        | USA              | 68-93                                                        | Count                      | Female               | 18                                                                          |             | 24                                         |                                |       | Poor    |            |  |
|                              |             |                       |                  |                                                              |                            | Male                 | 25                                                                          |             | 8                                          |                                |       |         |            |  |
|                              |             |                       |                  |                                                              | Result: mg/dL (mean (SE))  | Female               | 4.74 (0.05)                                                                 |             | 4.13 (0.09)                                |                                |       |         |            |  |
|                              |             |                       |                  |                                                              |                            | Male                 | 4.62 (0.06)                                                                 |             | 4.16 (0.17)                                |                                |       |         |            |  |
|                              |             | Outcome summary       | Female           | White (Caucasian) >Black (African-American)                  |                            |                      |                                                                             |             |                                            |                                |       |         |            |  |
|                              |             |                       | Male             | White (Caucasian) >Black (African-American)                  |                            |                      |                                                                             |             |                                            |                                |       |         |            |  |
| #Walte_r_1975 <sup>44</sup>  | Albumin     | NR                    | Germany          | NR                                                           | Count                      | Male                 | 100                                                                         | 100         | 100                                        |                                | Poor  |         |            |  |
|                              |             |                       |                  |                                                              | Result: mg/ml (mean (SD))  | Male                 | 44.4 (4.6)                                                                  | 54.3 (15.1) | 47.0 (6.8)                                 |                                |       |         |            |  |
|                              |             |                       |                  |                                                              | Outcome summary            | Male                 | Black> White (German), Asian (Indian) >White (German), Asian (Indian)>Black |             |                                            |                                |       |         |            |  |
|                              |             |                       |                  |                                                              |                            |                      |                                                                             |             |                                            |                                |       |         |            |  |
| #Bikle_1998 <sup>45</sup>    | Calcium     | CARDIA                | USA              | Range: 25-36                                                 | Count                      | Female               | 84                                                                          |             | 96                                         |                                | Poor  |         |            |  |
|                              |             |                       |                  |                                                              |                            | Male                 | 114                                                                         |             | 109                                        |                                |       |         |            |  |
|                              |             |                       |                  |                                                              | Result: mmol/L (mean (SD)) | Female               | 2.34 (0.12)                                                                 |             | 2.32 (0.11)                                |                                |       |         |            |  |
|                              |             |                       |                  |                                                              |                            | Male                 | 2.40 (0.12)                                                                 |             | 2.39 (0.11)                                |                                |       |         |            |  |
|                              |             | Outcome summary       | Female           | No evidence of difference in comparison with White and Black |                            |                      |                                                                             |             |                                            |                                |       |         |            |  |
|                              |             |                       | Male             |                                                              |                            |                      |                                                                             |             |                                            |                                |       |         |            |  |
| #Birk_2018 <sup>41</sup>     | Calcium     | Soroka medical Centre | Israel           | Range: 18-52                                                 | Count                      | Male                 | 109                                                                         |             |                                            | 110 (Bedouin)+ 253 (Sephardic) | Good  |         |            |  |
|                              |             |                       |                  |                                                              | Result: mmol/L (mean (SD)) | Male                 | 2.31 (0.1)                                                                  |             | 2.29 (0.12 Sephardic) & 2.27 (0.1 Bedouin) |                                |       |         |            |  |
|                              |             |                       |                  |                                                              | Outcome summary            | Male                 | White (Ashkenazi)>Other (Bedouin)                                           |             |                                            |                                |       |         |            |  |
|                              |             |                       |                  |                                                              |                            |                      |                                                                             |             |                                            |                                |       |         |            |  |
| #Brickman_1993 <sup>46</sup> | Calcium     | NR                    | USA              | Mean (SD)White: 38 (1.9) Black: 39 (1.7)                     | Count                      | Female               | 14                                                                          |             | 19                                         |                                | poor  |         |            |  |
|                              |             |                       |                  |                                                              |                            | Male                 | 20                                                                          |             | 12                                         |                                |       |         |            |  |
|                              |             |                       |                  |                                                              | Result: mg/dL (mean (SE))  | Gender not specified | 9.5 (0.06)                                                                  |             | 9.56 (0.07)                                |                                |       |         |            |  |
|                              |             |                       |                  |                                                              | Outcome summary            | Gender not specified | No evidence of difference Between White and Black                           |             |                                            |                                |       |         |            |  |

| Study ID                     | Blood tests | Dataset /study name | Country of study | Age (years)  | Stat                                    | Subgroup       | Ethnic distribution                                                                                                              |                                                        |                            |                           |       | Quality | Covariates |
|------------------------------|-------------|---------------------|------------------|--------------|-----------------------------------------|----------------|----------------------------------------------------------------------------------------------------------------------------------|--------------------------------------------------------|----------------------------|---------------------------|-------|---------|------------|
|                              |             |                     |                  |              |                                         |                | White                                                                                                                            | Asian                                                  | Black                      | Other                     | Mixed |         |            |
| #Godsl and_1983 <sup>4</sup> | Calcium     | NR                  | UK               | Range: 16-45 | Count                                   | Female         | 70                                                                                                                               | 36 (Oriental)+ 70 (Indian)                             | 102                        |                           |       | Good    |            |
|                              |             |                     |                  |              | Result: mmol/L (median (range))         | Female         | 2.34 (2.03 - 2.45)                                                                                                               | 2.18 (2.03 -2.41 Oriental) & 2.22 (1.94 - 2.54 Indian) | 2.24 (1.98 - 2.51)         |                           |       |         |            |
|                              |             |                     |                  |              | Outcome summary                         | Female         | No evidence of difference in comparison with White, Black and Asian (Oriental & Indian)                                          |                                                        |                            |                           |       |         |            |
| #Hams on_2003 <sup>47</sup>  | Calcium     | NR                  | UK               | Range: 20-40 | Count                                   | Female<br>Male | 51<br>37                                                                                                                         | 71<br>42                                               |                            |                           |       | Fair    |            |
|                              |             |                     |                  |              | Result: mmol/L (mean (SE))              | Female<br>Male | 2.2 (0.11)<br>2.2 (0.10)                                                                                                         | 2.2 (0.11)<br>1.1 (0.10)                               |                            |                           |       |         |            |
|                              |             |                     |                  |              | Outcome summary                         | Female<br>Male | No evidence of difference in comparison with White and Asian (Gujaratis)                                                         |                                                        |                            |                           |       |         |            |
| #Horn_2002 <sup>6</sup>      | Calcium     | NHANE S III         | USA              | NR           | Count                                   | Female<br>Male | 1279<br>1032                                                                                                                     |                                                        | 842<br>734                 | 909<br>1000               |       | Poor    |            |
|                              |             |                     |                  |              | Result: mmol/L (95% reference interval) | Female<br>Male | 2.1 - 2.5<br>2.15 - 2.53                                                                                                         |                                                        | 2.1 - 2.5<br>2.18 - 2.55   | 2.1 - 2.45<br>2.13 - 2.53 |       |         |            |
|                              |             |                     |                  |              | Outcome summary                         | Female<br>Male | No evidence of difference in comparison with White (Non-Hispanic White), Black (Non-Hispanic Black) and Other (Mexican American) |                                                        |                            |                           |       |         |            |
| #Perry_1993 <sup>43</sup>    | Calcium     | SHEP and CHIPS      | USA              | Range: 68-93 | Count                                   | Female<br>Male | 18<br>25                                                                                                                         |                                                        | 24<br>8                    |                           |       | Poor    |            |
|                              |             |                     |                  |              | Result: mg/dL (mean (SE))               | Female<br>Male | 8.19 (0.07)<br>8.06 (0.07)                                                                                                       |                                                        | 8.73 (0.09)<br>8.80 (0.14) |                           |       |         |            |
|                              |             |                     |                  |              | Outcome summary                         | Female<br>Male | Black (African-American)> White (Caucasian)<br>Black (African-American)> White (Caucasian)                                       |                                                        |                            |                           |       |         |            |

BMI: Body mass index; CRP: C reactive protein; Hb: haemoglobin; IQR: inter quartile range; MCV: mean cell volume HDL: high-density lipoproteins cholesterol; LDL-C: low-density lipoproteins cholesterol; MCV: mean cell volume; NR: Not reported; OR: odds ratio; PA: physical activity; SD: standard deviation; SE: standard error; SEM: standard error of the mean; TG: triacylglycerol; TC: total cholesterol; WC: Waist circumference; 95% CI: 95% confidence interval.

^Anaemia :<12g/dL for female, <13/dL for male;

Study designs: #cross-sectional study, ¶cohort study, ~trials

\* Adjusted Age BMI, history of hypertension, smoking status, diabetic status, alcohol use, exercise, history of myocardial infraction in mother and/or father, estrogen use, education, triglycerides, HDL,LDL

\*Adjusted for age, sex, ethnicity, education, working status, smoking status, serum cotinine concentration, hypertension, body mass index, waist-to-hip ratio, total cholesterol concentration, high-density lipoprotein cholesterol concentration, aspirin use;

\*\*Adjusted for education, smoking status, total cholesterol concentration, systolic blood pressure, waist circumference, alcohol use, and hormone replacement therapy;

\*\*\* Adjusted for location, education, leisure PA, total calories and percent calories from fat intake.

## Appendix 6 Meta-analyses result and forest plots

(IV: Weights are from fixed-effects model; DL: Weights are from random-effects model)

### Haemoglobin Black vs White female (subgroup-country)

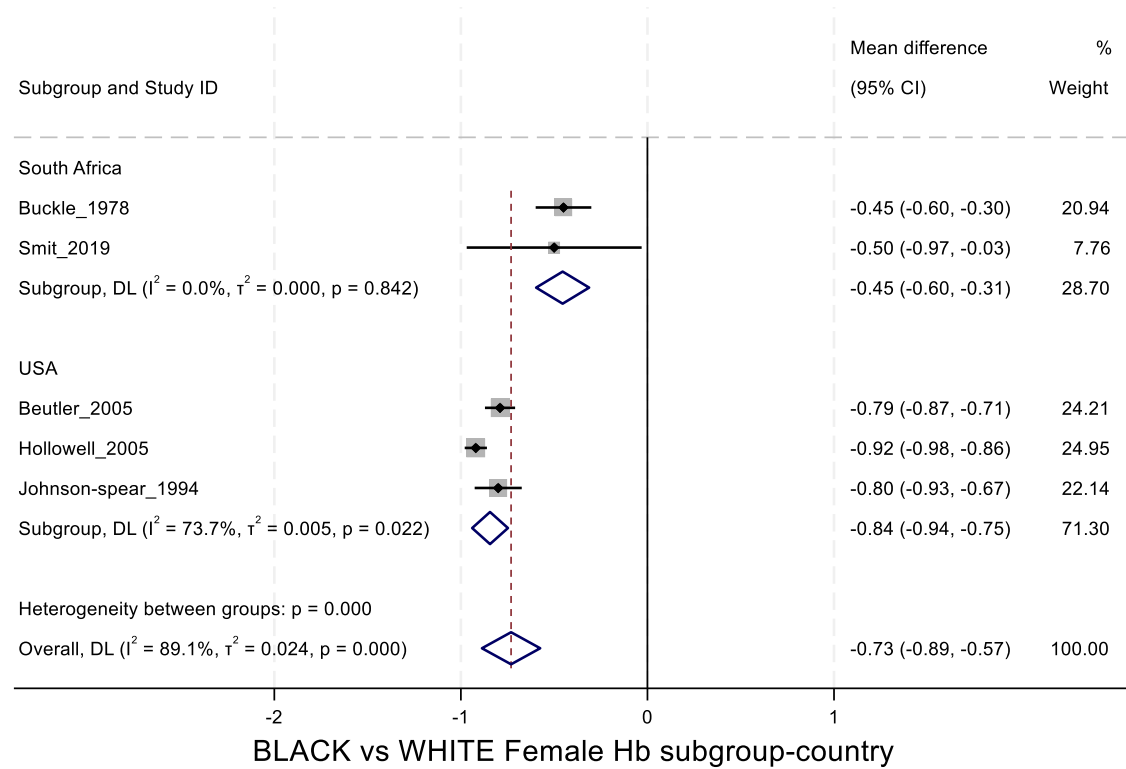

### Haemoglobin Black vs White female (subgroup-study quality)

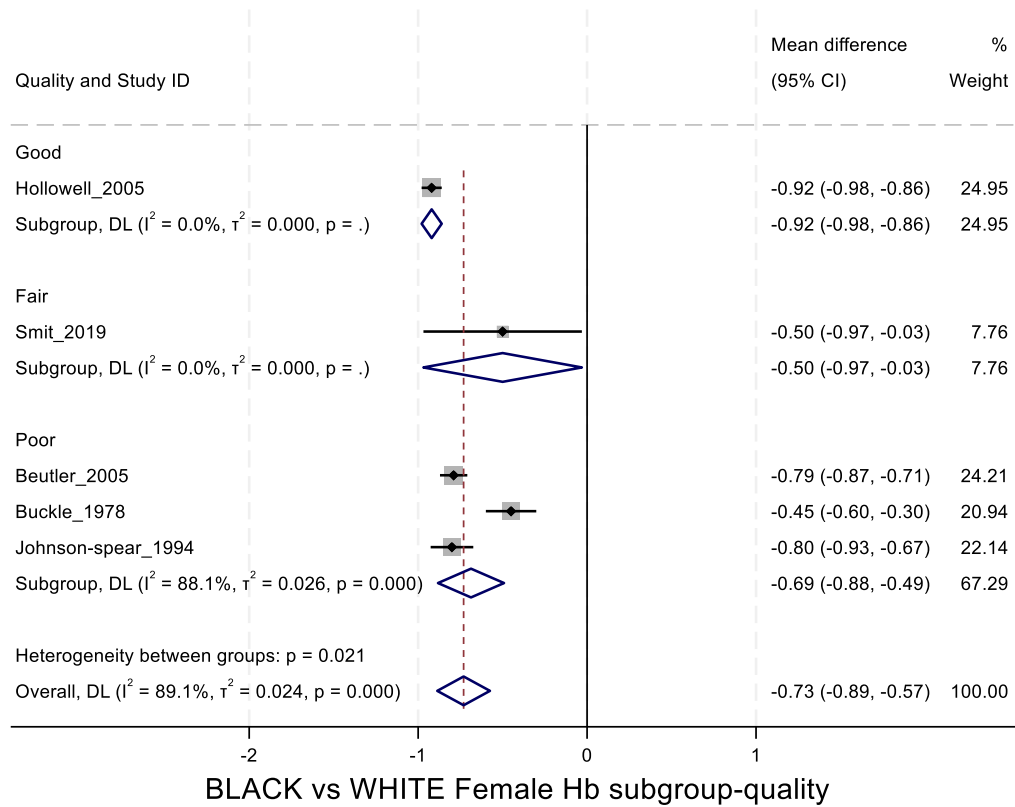

# Haemoglobin Black vs White female (Fixed-effects model and random-effects model)

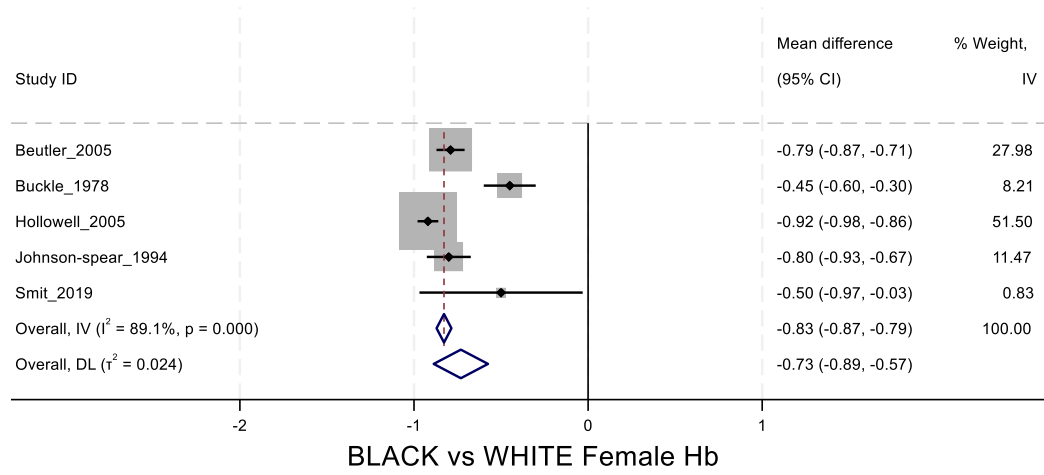

# Haemoglobin Black vs White male (subgroup-country)

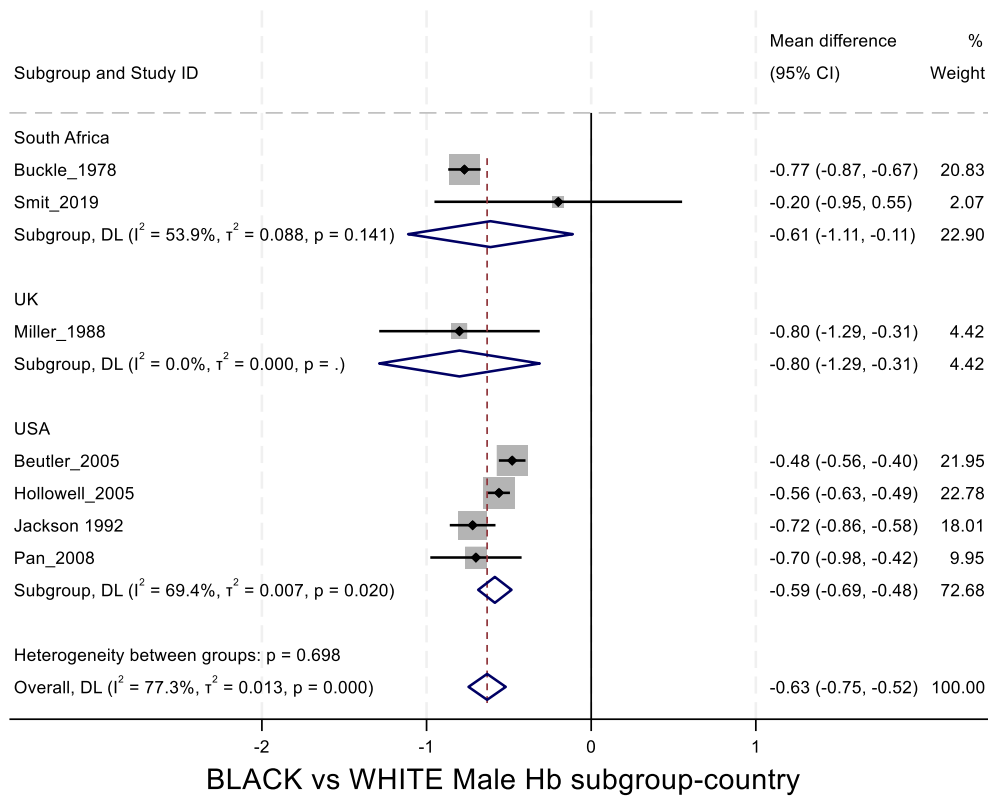



# Haemoglobin Black vs White male (subgroup-study quality)

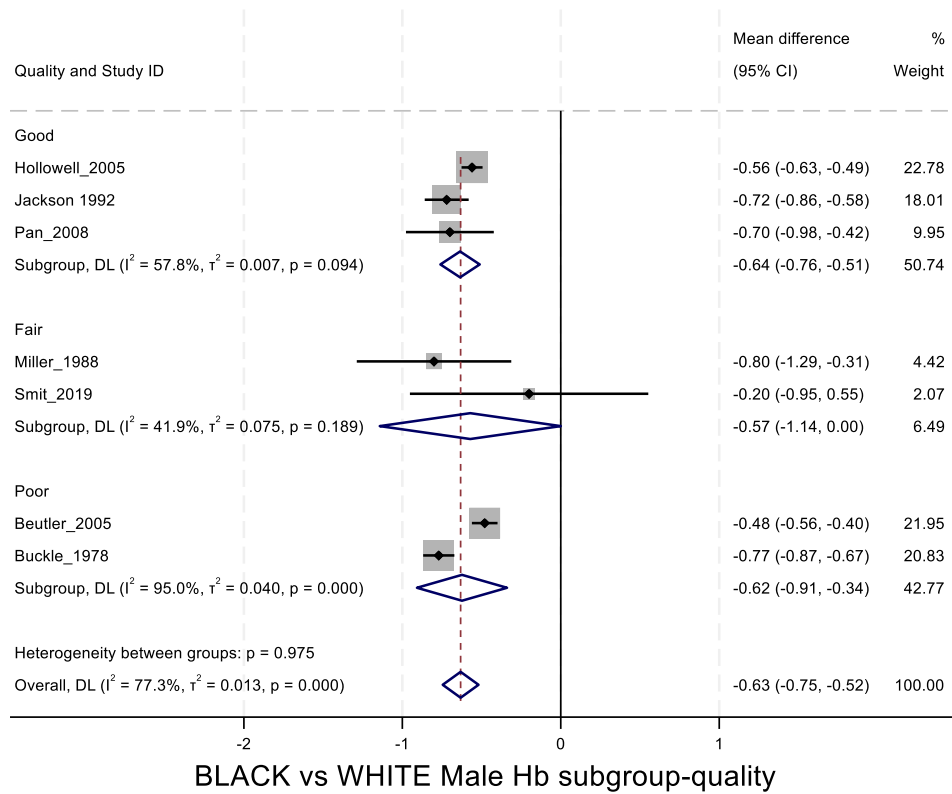

# Haemoglobin Black vs White male (Fixed-effects model and random-effects model)

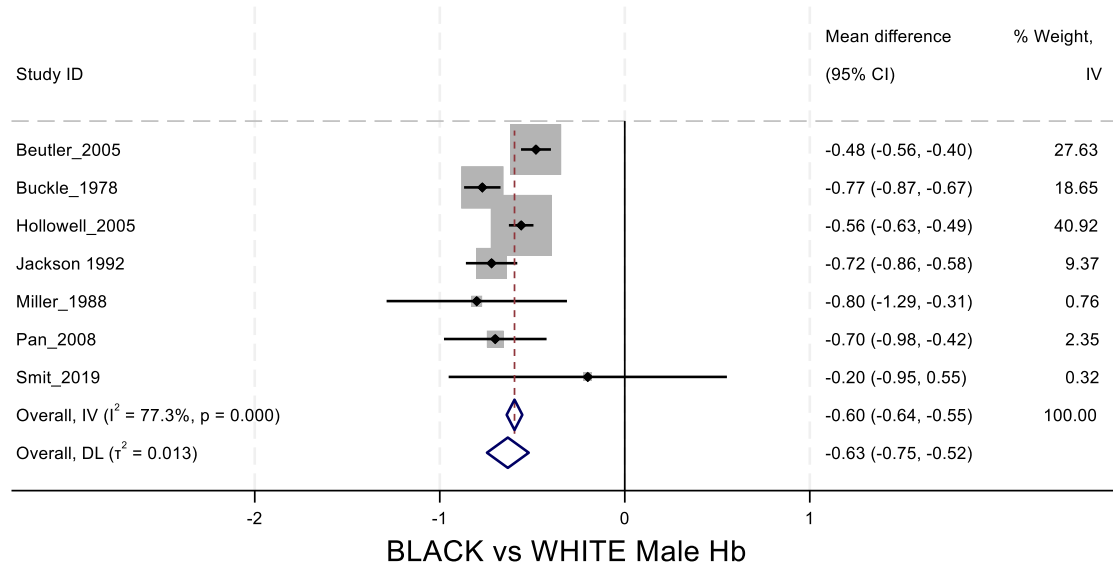

# Haemoglobin Asian vs White male (Fixed-effects model and random-effects model)

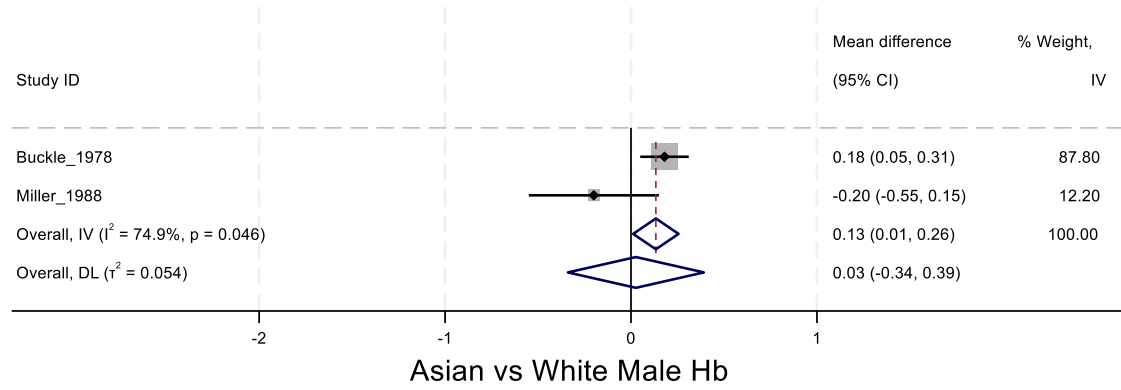

# Haemoglobin Black vs Asian female (Fixed-effects model and random-effects model)

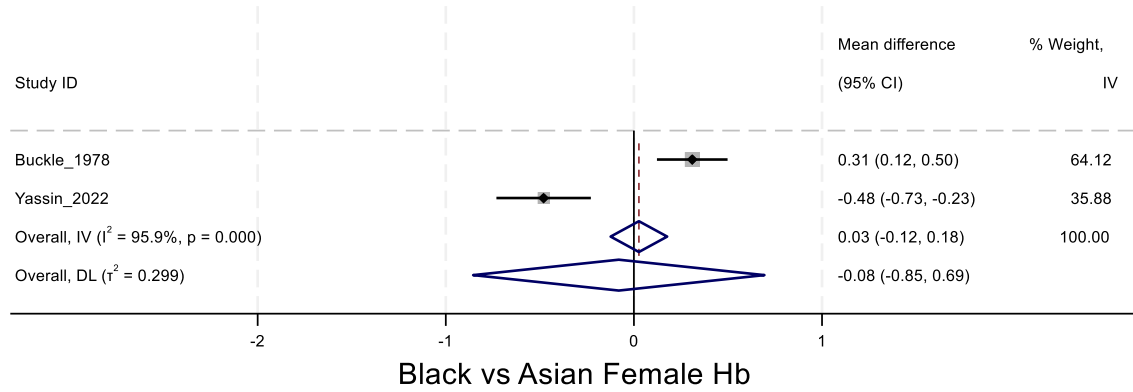

# Haemoglobin Black vs Asian male (Fixed-effects model and random-effects model)

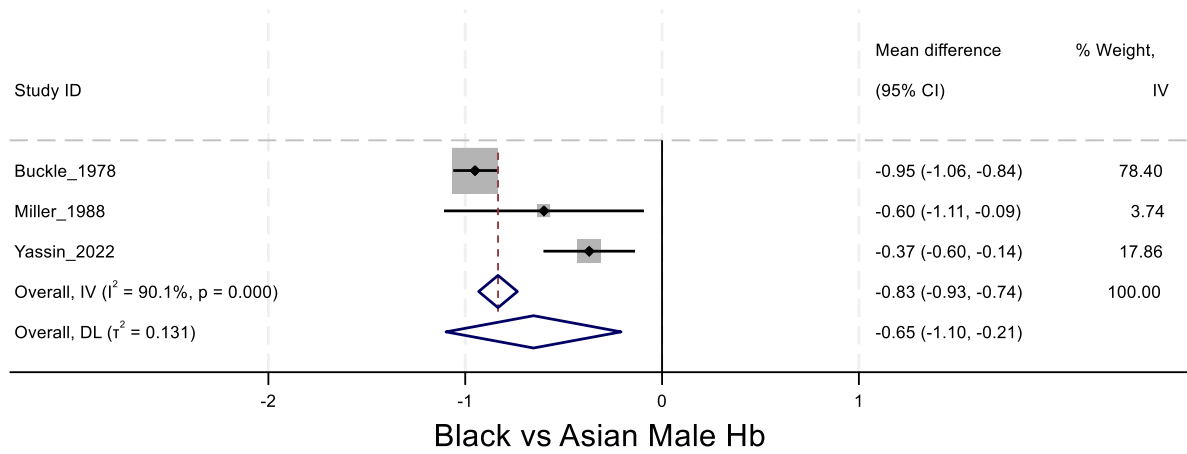

# MCV Black vs White female (subgroup by country of study)

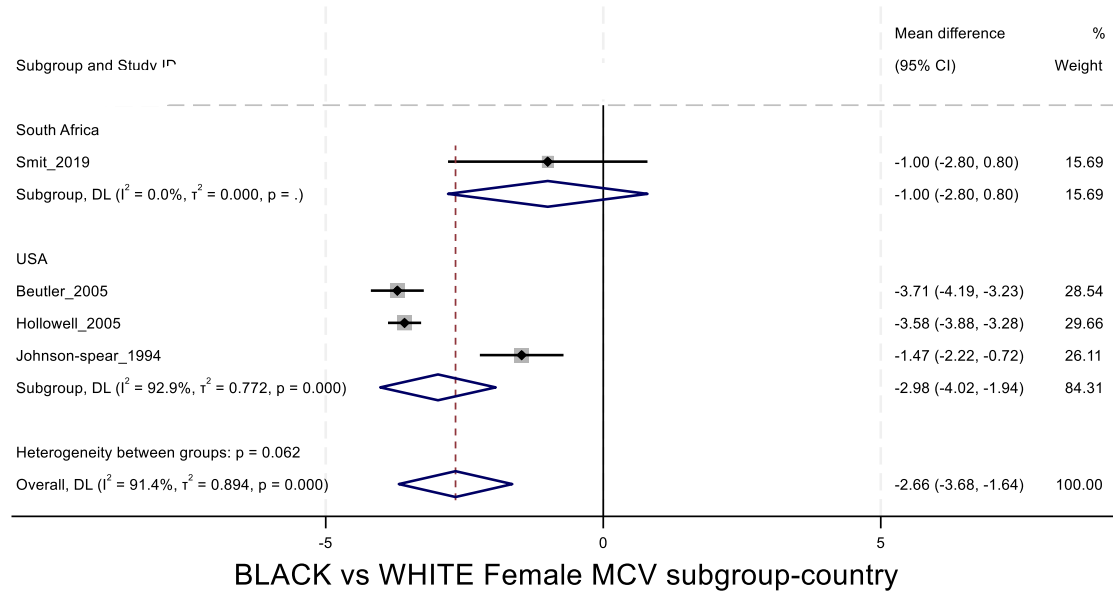

# MCV Black vs White female (subgroup by study quality)

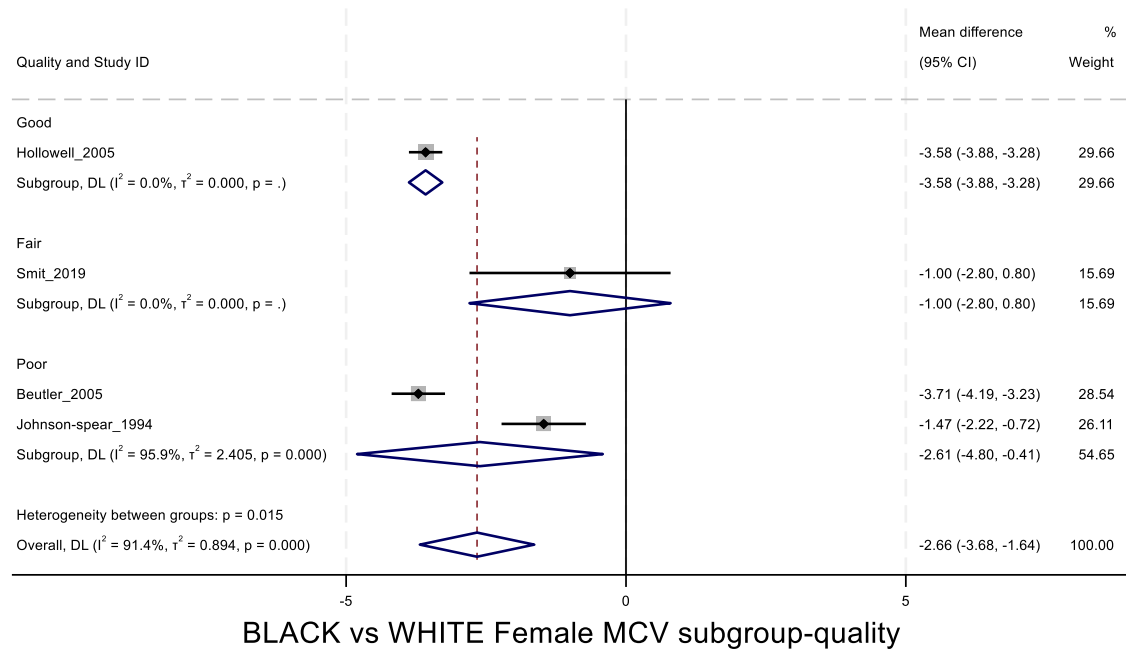

MCV Black vs White female (Fixed-effects model and random-effects model)

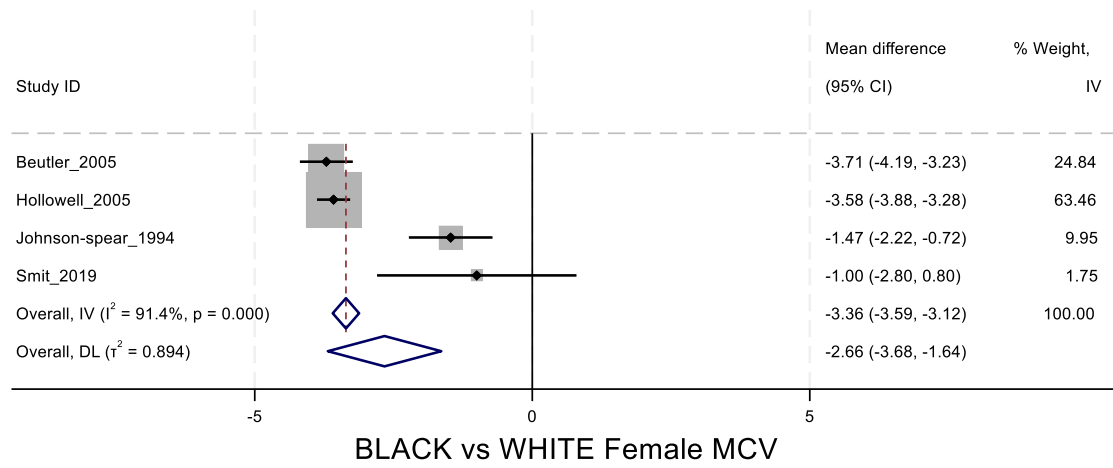



# MCV Black vs White male (subgroup by country of study)

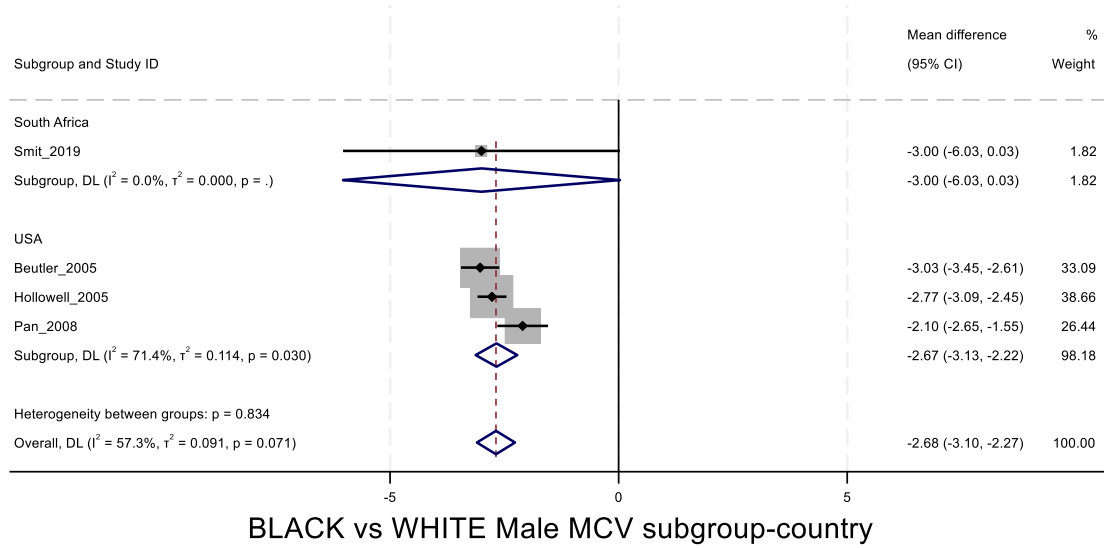

# MCV Black vs White male (subgroup by study quality)

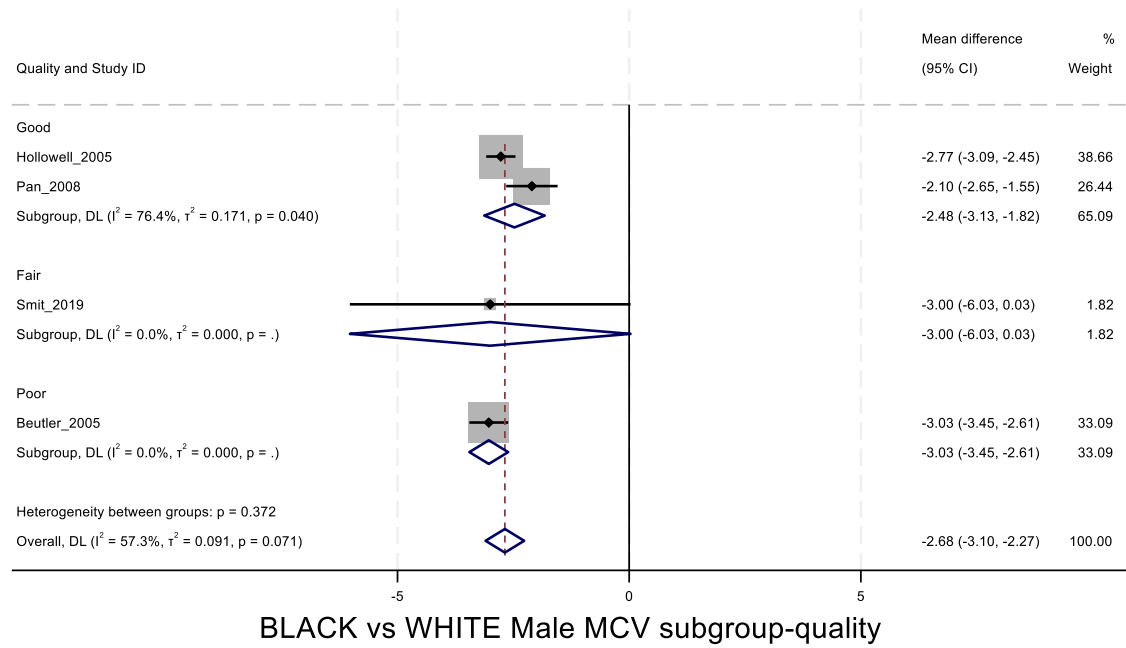

MCV Black vs White male (Fixed-effects model and random-effects model)

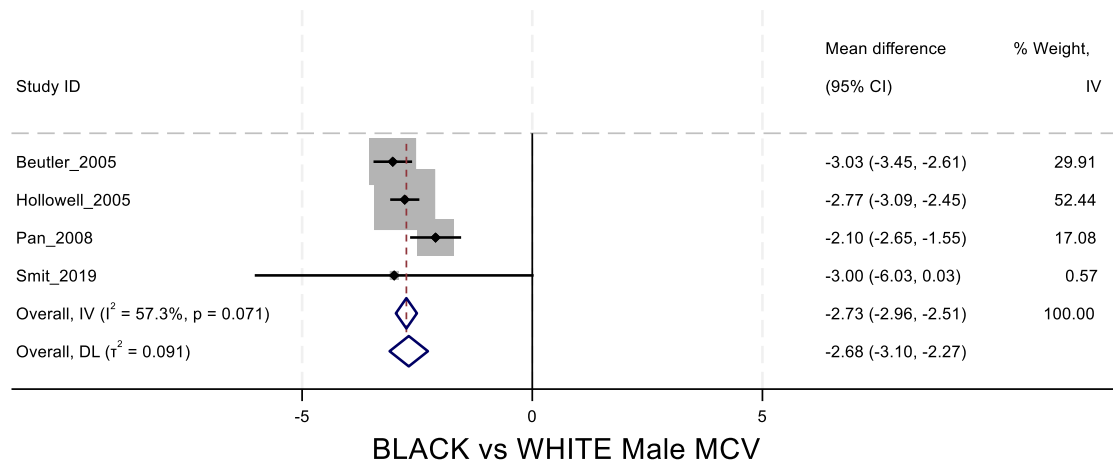

# Platelet (PLT) Black vs White female (Fixed-effects model and random-effects model)

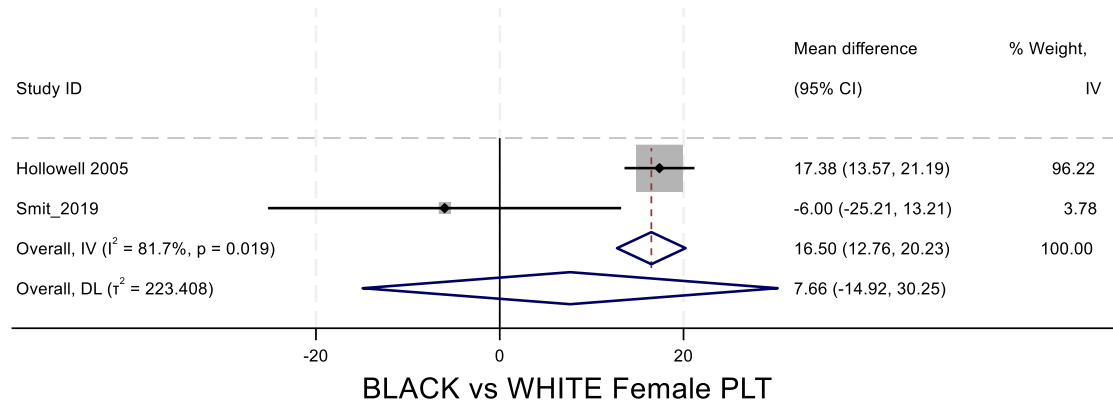

# Platelet (PLT) Black vs White male (subgroup-country of study)

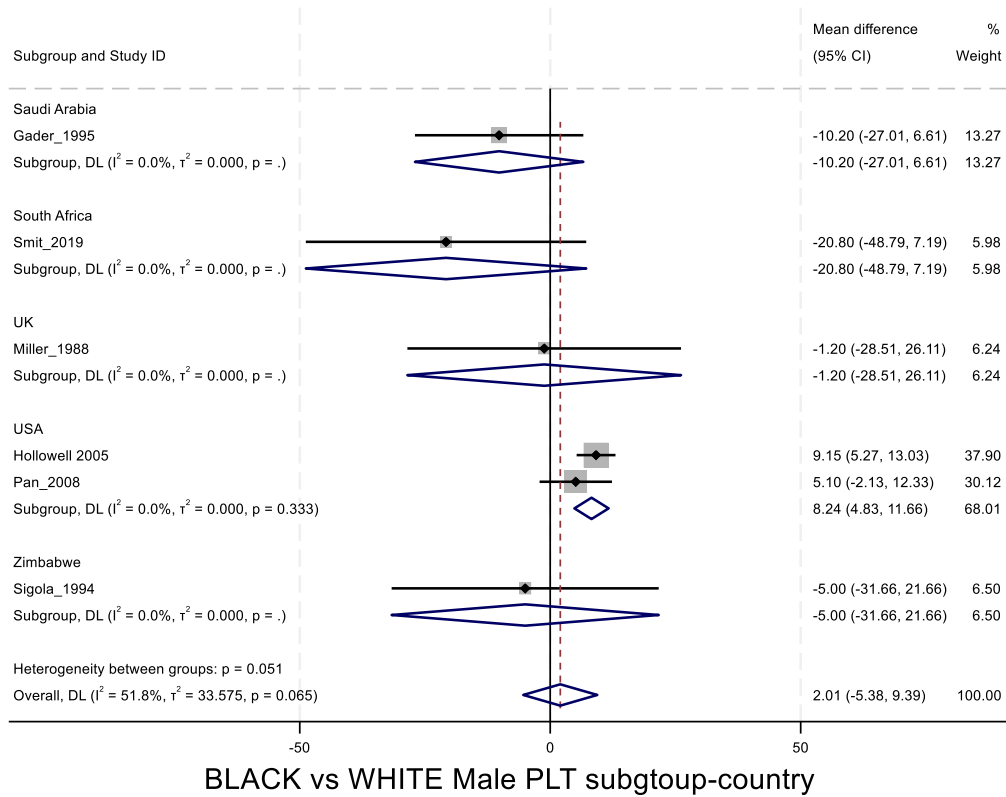

### Platelet (PLT) Black vs White male (subgroup-study quality)

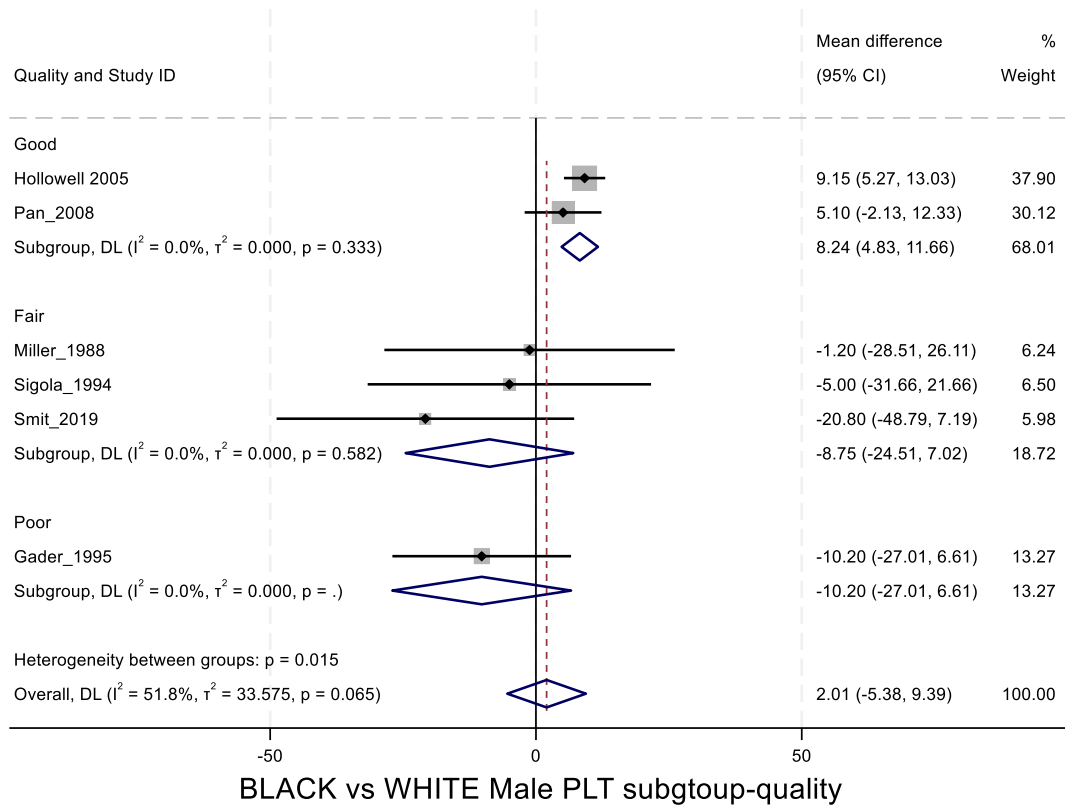

Platelet (PLT) Black vs White male (Fixed-effects model and random-effects model)

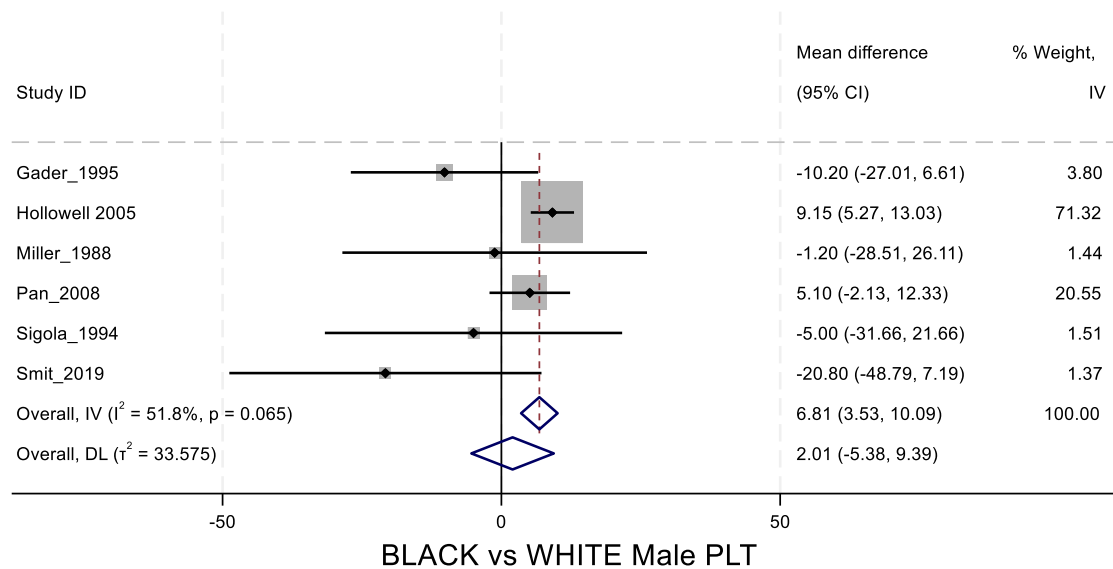

Platelet (PLT) Asian vs White male (Fixed-effects model and random-effects model)

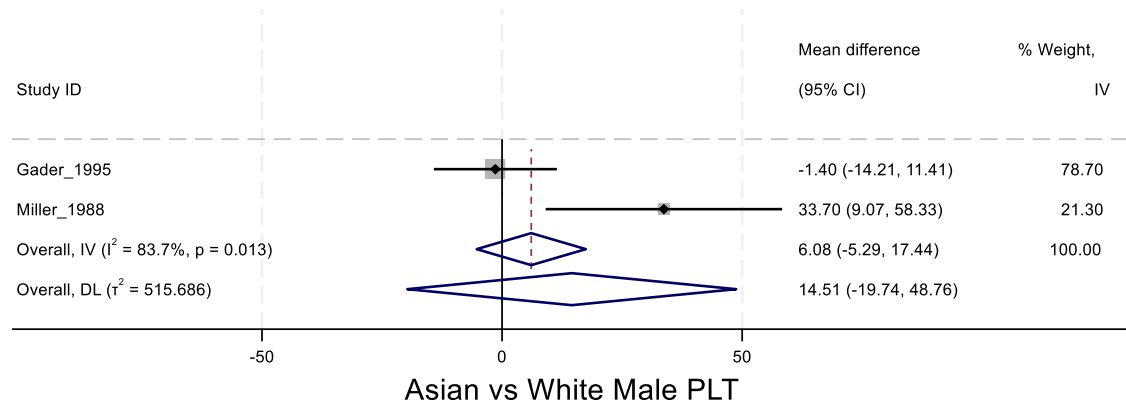



# Platelet (PLT) Black vs Asian male (Fixed-effects model and random-effects model)

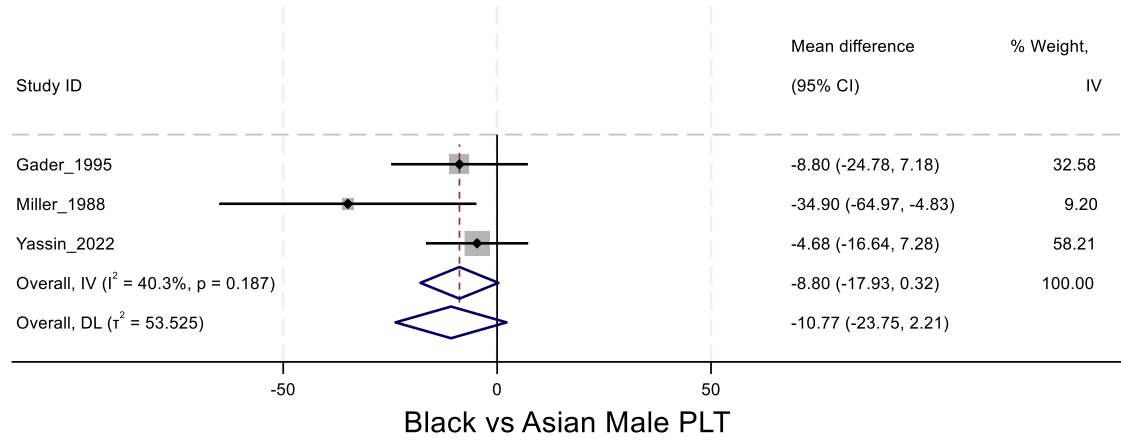

CRP Black vs White female (Fixed-effects model and random-effects model)

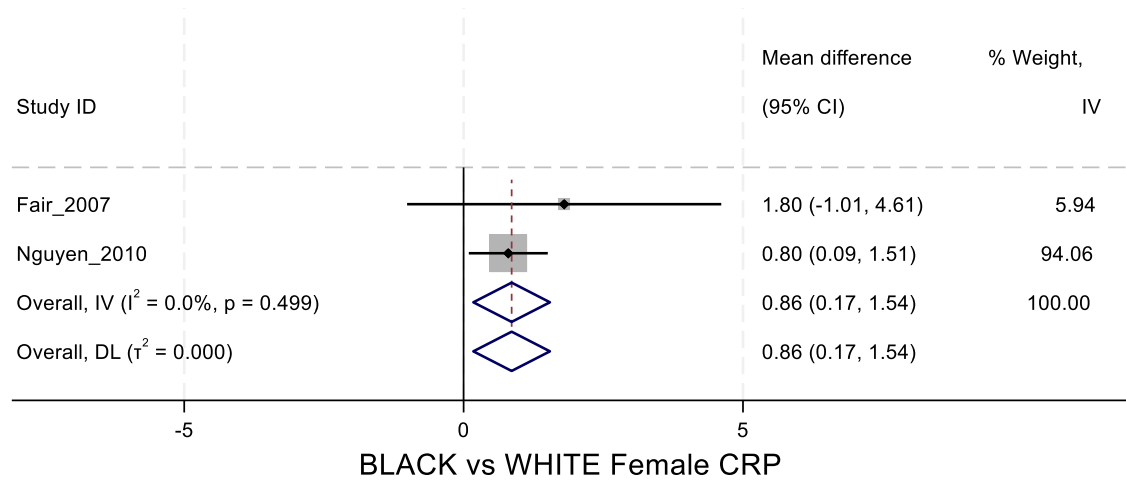

CRP Black vs White male (Fixed-effects model and random-effects model)

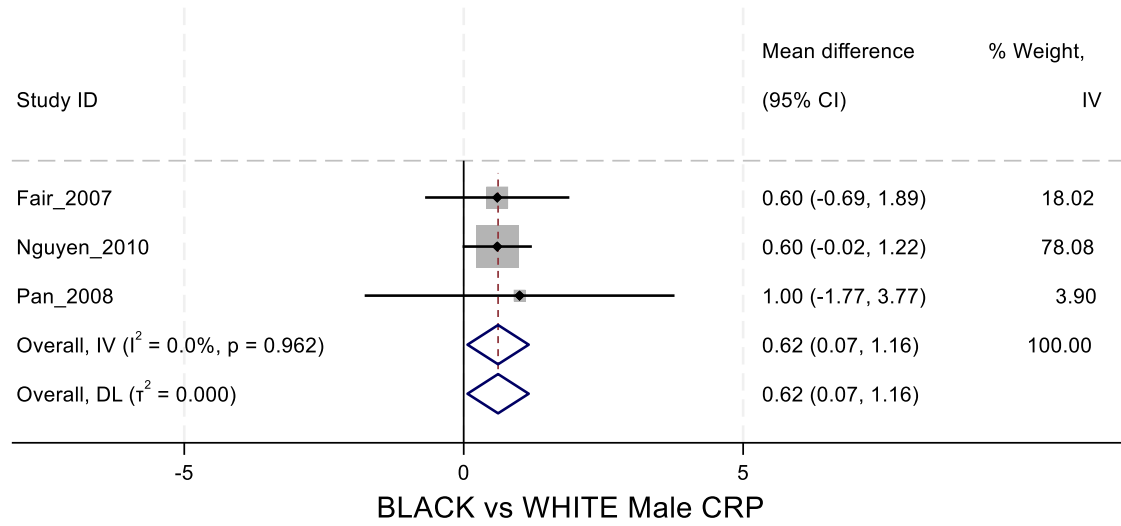

CRP Asian vs White female (Fixed-effects model and random-effects model)

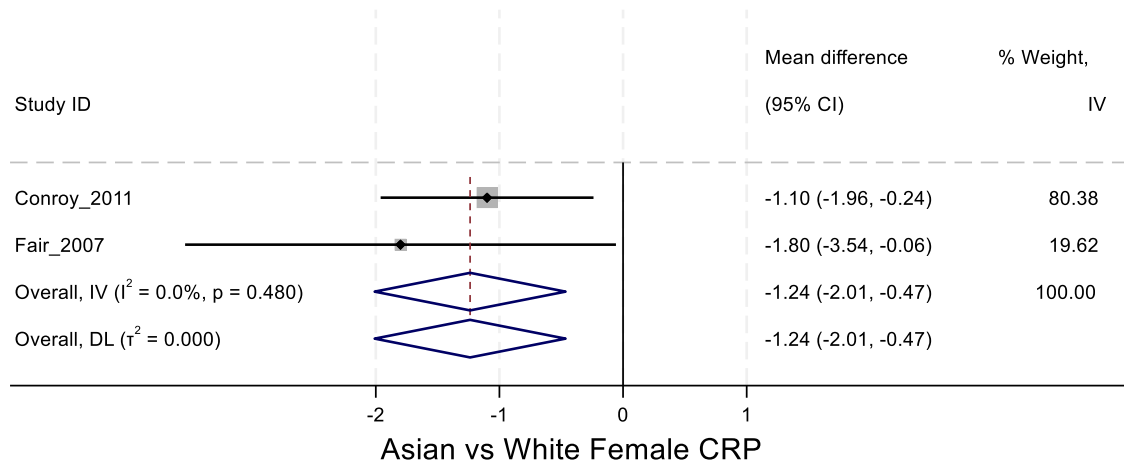

### Calcium Black vs White female (Fixed-effects model and random-effects model)

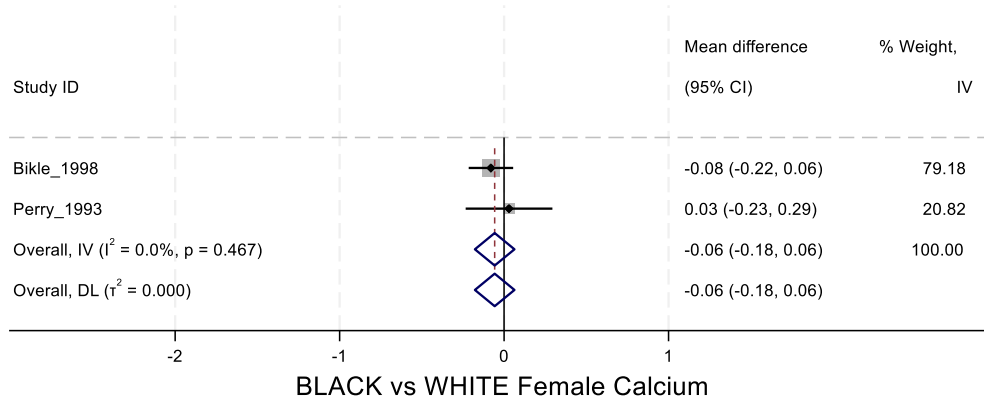

### Calcium Black vs White male (Fixed-effects model and random-effects model)

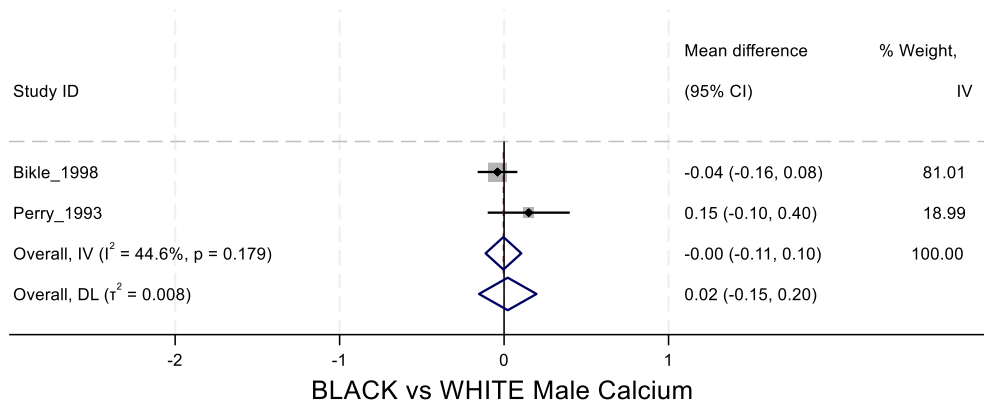

# Albumin (ALB) Black vs White male (Fixed-effects model and random-effects model)

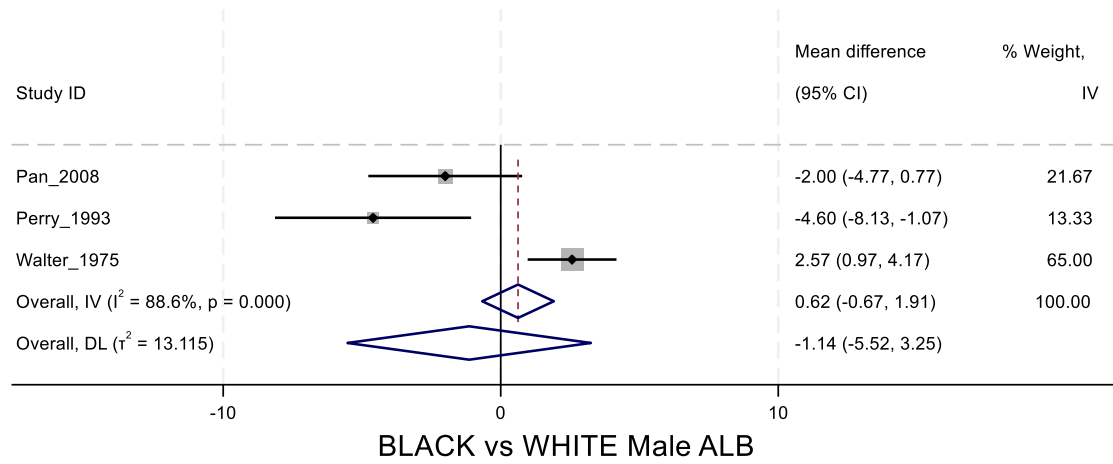

## References

1. Beutler E, West C. Hematologic differences between African-Americans and whites: the roles of iron deficiency and alpha-thalassemia on hemoglobin levels and mean corpuscular volume. *Blood*. Jul 15 2005;106(2):740-5.
2. Buckle GC, Webb GL. Computer simulation as a method for evaluating the copper sulfate test for hemoglobin in diverse populations. *Transfusion*. May-Jun 1978;18(3):323-8.
3. Cheng CK, Chan J, Cembrowski GS, van Assendelft OW. Complete blood count reference interval diagrams derived from NHANES III: stratification by age, sex, and race. *Laboratory Hematology*. 2004;10(1):42-53.
4. Godsland IF, Seed M, Simpson R, Broom G, Wynn V. Comparison of haematological indices between women of four ethnic groups and the effect of oral contraceptives. *Journal of Clinical Pathology*. Feb 1983;36(2):184-91.
5. Hollowell JG, van Assendelft OW, Gunter EW, Lewis BG, Najjar M, Pfeiffer C. Hematological and iron-related analytes--reference data for persons aged 1 year and over: United States, 1988-94. *Vital and health statistics*. Mar 2005;Series 11, Data from the national health survey.(247):1-156.
6. Horn PS, Pesce AJ. Effect of ethnicity on reference intervals. *Clinical Chemistry*. Oct 2002;48(10):1802-4.
7. Jackson RT. Hemoglobin comparisons between African American and European American males with hemoglobin values in the normal range. *American Journal of Human Biology*. 1992;4(3):313-318. doi:<https://dx.doi.org/10.1002/ajhb.1310040306>
8. Jim RT. Red blood count, hemoglobin and red cell indices in healthy adult orientals in Hawaii. *Hawaii Medical Journal*. May 1987;46(5):158, 160, 163-6.
9. Johnson-Spear MA, Yip R. Hemoglobin difference between black and white women with comparable iron status: justification for race-specific anemia criteria. *American Journal of Clinical Nutrition*. Jul 1994;60(1):117-21.
10. Kerr GR, Lee ES, Lam MK, et al. Relationship between dietary and biochemical measures of nutritional status in HANES I data. *American Journal of Clinical Nutrition*. Feb 1982;35(2):294-307.
11. Kozlitina J, Garcia CK. Red blood cell size is inversely associated with leukocyte telomere length in a large multi-ethnic population. *PLoS ONE [Electronic Resource]*. 2012;7(12):e51046. doi:<https://dx.doi.org/10.1371/journal.pone.0051046>
12. Lawrie D, Coetzee LM, Becker P, Mahlangu J, Stevens W, Glencross DK. Local reference ranges for full blood count and CD4 lymphocyte count testing. *South African Medical Journal Suid-Afrikaanse Tydskrif Vir Geneeskunde*. Apr 2009;99(4):243-8.
13. Le CH. The Prevalence of Anemia and Moderate-Severe Anemia in the US Population (NHANES 2003-2012). *PLoS ONE [Electronic Resource]*. 2016;11(11):e0166635. doi:<https://dx.doi.org/10.1371/journal.pone.0166635>
14. Mast AE, Steele WR, Johnson B, et al. Population-based screening for anemia using first-time blood donors. *American Journal of Hematology*. 2012;doi:<http://dx.doi.org/10.1002/ajh.23171>
15. Miller GJ, Kotecha S, Wilkinson WH, et al. Dietary and other characteristics relevant for coronary heart disease in men of Indian, West Indian and European descent in London. *Atherosclerosis*. 1988;70(1-2):63-72.
16. Pan Y, Jackson RT. Insights into the ethnic differences in serum ferritin between black and white US adult men. *American Journal of Human Biology*. Jul-Aug 2008;20(4):406-16. doi:<https://dx.doi.org/10.1002/ajhb.20745>
17. Smit FC, Davison GM, Hoffmann M, Erasmus RT, Davids S, Matsha TE. Full blood count and white cell differential count reference ranges obtained from a healthy urban South African population residing in the Western Cape of South Africa. *International Journal of Laboratory Hematology*. Oct 2019;41(5):635-641. doi:<https://dx.doi.org/10.1111/ijlh.13076>
18. Thomson CA, Stanaway JD, Neuhaus ML, et al. Nutrient Intake and Anemia Risk in the Women's Health Initiative Observational Study. *Journal of the American Dietetic Association*. April 2011;111(4):532-541. doi:<http://dx.doi.org/10.1016/j.jada.2011.01.017>
19. Yassin MA, Soliman AT, Nashwan AJ, et al. Hematological indices reference intervals for a healthy Arab population in Qatar: Effect of age, gender, and geographic location. *Medicine*. 2022;101(24):e29271. doi:<https://dx.doi.org/10.1097/MD.00000000000029271>

20. Johnson AM, Petersen PH, Whicher JT, Carlstrom A, MacLennan S. Reference intervals for serum proteins: Similarities and differences between adult Caucasian and Asian Indian males in Yorkshire, UK. *Clinical Chemistry and Laboratory Medicine*. 2004;42(7):792-799. doi:<http://dx.doi.org/10.1515/CCLM.2004.132>
21. Bain BJ, Seed M. Platelet count and platelet size in healthy Africans and West Indians. *Clinical & Laboratory Haematology*. 1986;8(1):43-8.
22. Bain BJ. Ethnic and sex differences in the total and differential white cell count and platelet count. *Journal of Clinical Pathology*. Aug 1996;49(8):664-6.
23. Gader A, Bahakim H, Awadalla S, Malaika S. Ethnic variations in the haemostatic system: comparison between Arabs, Westerners (Europeans and Americans), Asians and Africans. *Blood Coagulation & Fibrinolysis*. Sep 1995;6(6):537-42.
24. Segal JB, Moliterno AR. Platelet counts differ by sex, ethnicity, and age in the United States. *Annals of Epidemiology*. Feb 2006;16(2):123-30.
25. Sigola LB, Mufunda J, Adewuyi JO, Keogh E. Factor VII, antithrombin III, leukocyte and platelet counts in a sample of black and white Zimbabwean blood donors. *Thrombosis Research*. Jul 01 1994;75(1):73-9.
26. Akinyemiju T, Moore JX, Pisu M, et al. Association of baseline inflammatory biomarkers with cancer mortality in the REGARDS cohort. *Oncotarget*. 01 Aug 2019;10(47):4857-4867.
27. Albert MA, Glynn RJ, Buring J, Ridker PM. C-reactive protein levels among women of various ethnic groups living in the United States (from the Women's Health Study). *American Journal of Cardiology*. May 15 2004;93(10):1238-42.
28. Anand SS, Razak F, Yi Q, et al. C-reactive protein as a screening test for cardiovascular risk in a multiethnic population. *Arteriosclerosis, Thrombosis & Vascular Biology*. Aug 2004;24(8):1509-15.
29. Beasley LE, Koster A, Newman AB, et al. Inflammation and race and gender differences in computerized tomography-measured adipose depots. *Obesity*. May 2009;17(5):1062-1069. doi:<http://dx.doi.org/10.1038/oby.2008.627>
30. Chandalia M, Cabo-Chan AV, Jr., Devaraj S, Jialal I, Grundy SM, Abate N. Elevated plasma high-sensitivity C-reactive protein concentrations in Asian Indians living in the United States. *Journal of Clinical Endocrinology & Metabolism*. Aug 2003;88(8):3773-6.
31. Conroy SM, Chai W, Lim U, Franke AA, Cooney RV, Maskarinec G. Leptin, adiponectin, and obesity among Caucasian and Asian women. *Mediators of Inflammation*. 2011;2011:253580. doi:<https://dx.doi.org/10.1155/2011/253580>
32. Fair JM, Kiazand A, Varady A, et al. Ethnic differences in coronary artery calcium in a healthy cohort aged 60 to 69 years. *American Journal of Cardiology*. Sep 15 2007;100(6):981-5.
33. Ford ES. Does exercise reduce inflammation? Physical activity and C-reactive protein among U.S. adults. *Epidemiology*. Sep 2002;13(5):561-8.
34. Ford ES, Giles WH, Mokdad AH, Myers GL. Distribution and Correlates of C-Reactive Protein Concentrations among Adult US Women. *Clinical Chemistry*. March 2004;50(3):574-581. doi:<http://dx.doi.org/10.1373/clinchem.2003.027359>
35. Hanley AJ, Bowden D, Wagenknecht LE, et al. Associations of adiponectin with body fat distribution and insulin sensitivity in nondiabetic Hispanics and African-Americans. *Journal of Clinical Endocrinology & Metabolism*. Jul 2007;92(7):2665-71.
36. Khera A, McGuire DK, Murphy SA, et al. Race and gender differences in C-reactive protein levels. *Journal of the American College of Cardiology*. Aug 02 2005;46(3):464-9.
37. Lin SX, Pi-Sunyer EX. Prevalence of the metabolic syndrome among US middle-aged and older adults with and without diabetes--a preliminary analysis of the NHANES 1999-2002 data. *Ethnicity & Disease*. 2007;17(1):35-9.
38. Matthews KA, Sowers MF, Derby CA, et al. Ethnic differences in cardiovascular risk factor burden among middle-aged women: Study of Women's Health Across the Nation (SWAN). *American Heart Journal*. Jun 2005;149(6):1066-73.
39. Nguyen QM, Srinivasan SR, Xu JH, Chen W, Berenson GS. Distribution and cardiovascular risk correlates of plasma soluble intercellular adhesion molecule-1 levels in asymptomatic young adults from a biracial community: the Bogalusa Heart Study. *Annals of Epidemiology*. Jan 2010;20(1):53-9. doi:<https://dx.doi.org/10.1016/j.annepidem.2009.10.001>



40. Wener MH, Daum PR, McQuillan GM. The influence of age, sex, and race on the upper reference limit of serum C-reactive protein concentration. *Journal of Rheumatology*. Oct 2000;27(10):2351-9.
41. Birk R, Heifetz EM. Variations in biochemical values for common laboratory tests: a comparison among multi-ethnic Israeli women cohort. *Irish Journal of Medical Science*. Feb 2019;188(1):249-258. doi:<https://dx.doi.org/10.1007/s11845-018-1825-y>
42. Manolio TA, Burke GL, Savage PJ, et al. Sex- and race-related differences in liver-associated serum chemistry tests in young adults in the CARDIA study. *Clinical Chemistry*. Sep 1992;38(9):1853-9.
43. Perry HM, 3rd, Miller DK, Morley JE, et al. A preliminary report of vitamin D and calcium metabolism in older African Americans. *Journal of the American Geriatrics Society*. Jun 1993;41(6):612-6.
44. Walter H, Schoebel B. Climate associated variations in the human serum albumin level. *Humangenetik*. 1975;30(4):331-335.
45. Bikle DD, Ettinger B, Sidney S, Tekawa IS, Tolani K. Differences in calcium metabolism between black and white men and women. *Mineral & Electrolyte Metabolism*. May-Jun 1999;25(3):178-84.
46. Brickman AS, Nyby MD, Griffiths RF, von Hungen K, Tuck ML. Racial differences in platelet cytosolic calcium and calcitropic hormones in normotensive subjects. *American Journal of Hypertension*. Jan 1993;6(1):46-51.
47. Hamson C, Goh L, Sheldon P, Samanta A. Comparative study of bone mineral density, calcium, and vitamin D status in the Gujarati and white populations of Leicester. *Postgraduate Medical Journal*. May 2003;79(931):279-83.
